# Supplementary material for: Deoxygenation of amine N-oxides using gold nanoparticles supported on carbon nanotubes
Source: Royal Society of Chemistry journal article supplement (doi:10.1039/c5ra08845c), 2015-01-01
Supplement: c5ra08845c1.pdf [file c5ra08845c1.pdf]

## Supporting Information

|                                                                                     | Page No |
|-------------------------------------------------------------------------------------|---------|
| Figure S1. $^1\text{H}$ NMR Spectrum of <b>2a</b>                                   | 2       |
| Figure S2. $^{13}\text{C}$ NMR Spectrum of <b>2a</b>                                | 3       |
| Figure S3. $^1\text{H}$ NMR Spectrum of <b>2b</b>                                   | 4       |
| Figure S4. $^{13}\text{C}$ NMR Spectrum of <b>2b</b>                                | 5       |
| Figure S5. $^1\text{H}$ NMR Spectrum of <b>2c</b>                                   | 6       |
| Figure S6. $^{13}\text{C}$ NMR Spectrum of <b>2c</b>                                | 7       |
| Figure S7. $^1\text{H}$ NMR Spectrum of <b>2d</b>                                   | 8       |
| Figure S8. $^{13}\text{C}$ NMR Spectrum of <b>2d</b>                                | 9       |
| Figure S9. $^1\text{H}$ NMR Spectrum of <b>2e</b>                                   | 10      |
| Figure S10. $^{13}\text{C}$ NMR Spectrum of <b>2e</b>                               | 11      |
| Figure S11. $^1\text{H}$ NMR Spectrum of <b>2f</b>                                  | 12      |
| Figure S12. $^{13}\text{C}$ NMR Spectrum of <b>2f</b>                               | 13      |
| Figure S13. $^1\text{H}$ NMR Spectrum of <b>2g</b>                                  | 14      |
| Figure S14. $^{13}\text{C}$ NMR Spectrum of <b>2g</b>                               | 15      |
| Figure S15. $^1\text{H}$ NMR Spectrum of <b>2h</b>                                  | 16      |
| Figure S16. $^{13}\text{C}$ NMR Spectrum of <b>2h</b>                               | 17      |
| Figure S17. $^1\text{H}$ NMR Spectrum of <b>2i</b>                                  | 18      |
| Figure S18. $^{13}\text{C}$ NMR Spectrum of <b>2i</b>                               | 19      |
| Figure S19. $^1\text{H}$ NMR Spectrum of <b>2j</b>                                  | 20      |
| Figure S20. $^{13}\text{C}$ NMR Spectrum of <b>2j</b>                               | 21      |
| Figure S21. $^1\text{H}$ NMR Spectrum of <b>2k</b>                                  | 22      |
| Figure S22. $^{13}\text{C}$ NMR Spectrum of <b>2k</b>                               | 23      |
| Figure S23. $^1\text{H}$ NMR Spectrum of <b>2l</b>                                  | 24      |
| Figure S24. $^{13}\text{C}$ NMR Spectrum of <b>2l</b>                               | 25      |
| Figure S25. $^2\text{H}$ NMR Spectrum of <b>2a'</b>                                 | 26      |
| Typical procedure for the deoxygenation of amine <i>N</i> -oxides and spectral data | 27      |

```

===== Data Parameters
NAME      INN-NMS-1H
EXPNO    1
PROCNO    1

===== Acquisition Parameters
DATE_     20150312
TIME      12.44
INSTRUM   spect
PROBHD    5 mm PABBO BB/
PULPROG   zg30
TD         65536
SOLVENT   CDCl3
NS         16
DS         2
SWH        10000.000 Hz
FIDRES     0.152588 Hz
AQ         3.2767999 sec
RG         30.72
RW         50.000 usec
DE         6.50 usec
TE         294.9 K
D1         1.00000000 sec
TEC        1

----- CHANNEL f1 -----
SFO1      500.1330885 MHz
NUC1       1H
P1         13.00 usec
PLW1      12.00000000 W

F2 - Processing parameters
SI         65536
SF         500.1300124 MHz
WDW        EM
SSB        0
LB         0.30 Hz
GB         0
PC         1.00

```

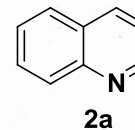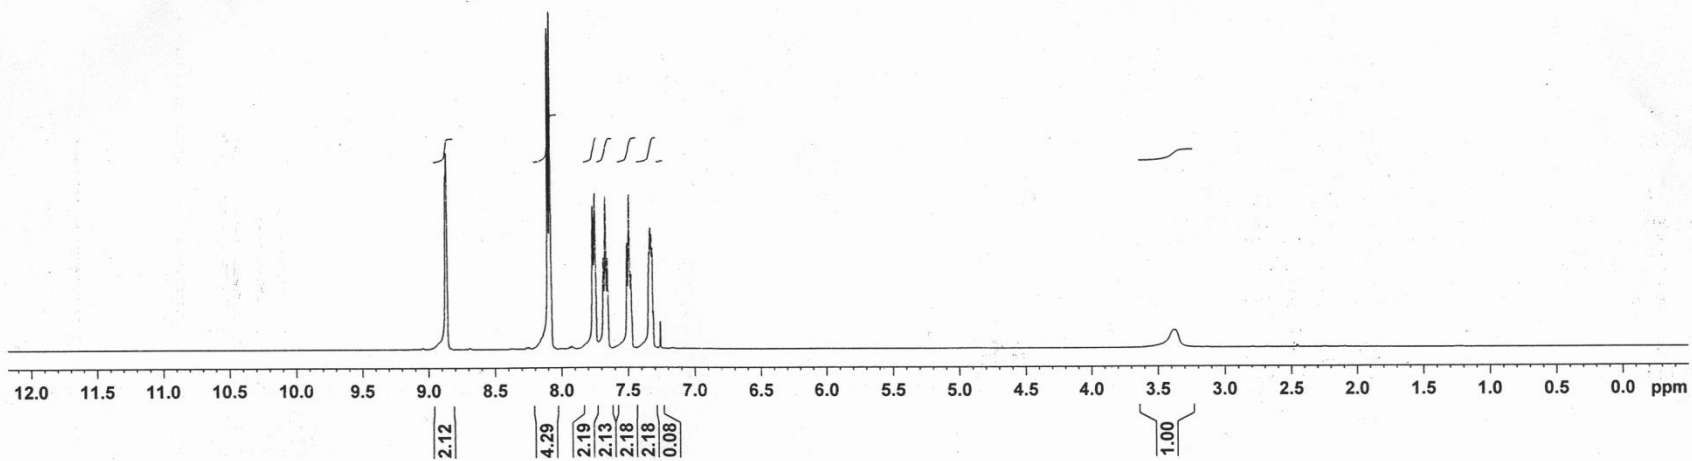

**Figure S1. <sup>1</sup>H NMR Spectrum of 2a**

Current Data Parameters  
NAME INN-SD-58-13C  
EXPNO 2  
PROCNO 1

F2 - Acquisition Parameters  
Date\_ 20140730  
Time 18.26  
INSTRUM spect  
PROBHD 5 mm PABBO BB/  
PULPROG zgpg30  
TD 65536  
SOLVENT CDCl3  
NS 64  
DS 4  
SWH 29761.904 Hz  
FIDRES 0.454131 Hz  
AQ 1.1010048 sec  
RG 197.27  
DW 16.800 usec  
DE 6.50 usec  
TE 299.6 K  
D1 1.00000000 sec  
D11 0.03000000 sec  
TD0 1

----- CHANNEL f1 -----  
SFO1 125.7703637 MHz  
NUC1 13C  
P1 8.90 usec  
PLW1 103.00000000 W

----- CHANNEL f2 -----  
SFO2 500.1320005 MHz  
NUC2 1H  
CPDPRG[2] waltz16  
PCPD2 80.00 usec  
PLW2 13.00000000 W  
PLW12 0.34327999 W  
PLW13 0.21969999 W

F2 - Processing parameters  
SI 32768  
SF 125.7577701 MHz  
WDW EM  
SSB 0  
LB 1.00 Hz  
GB 0  
PC 1.40

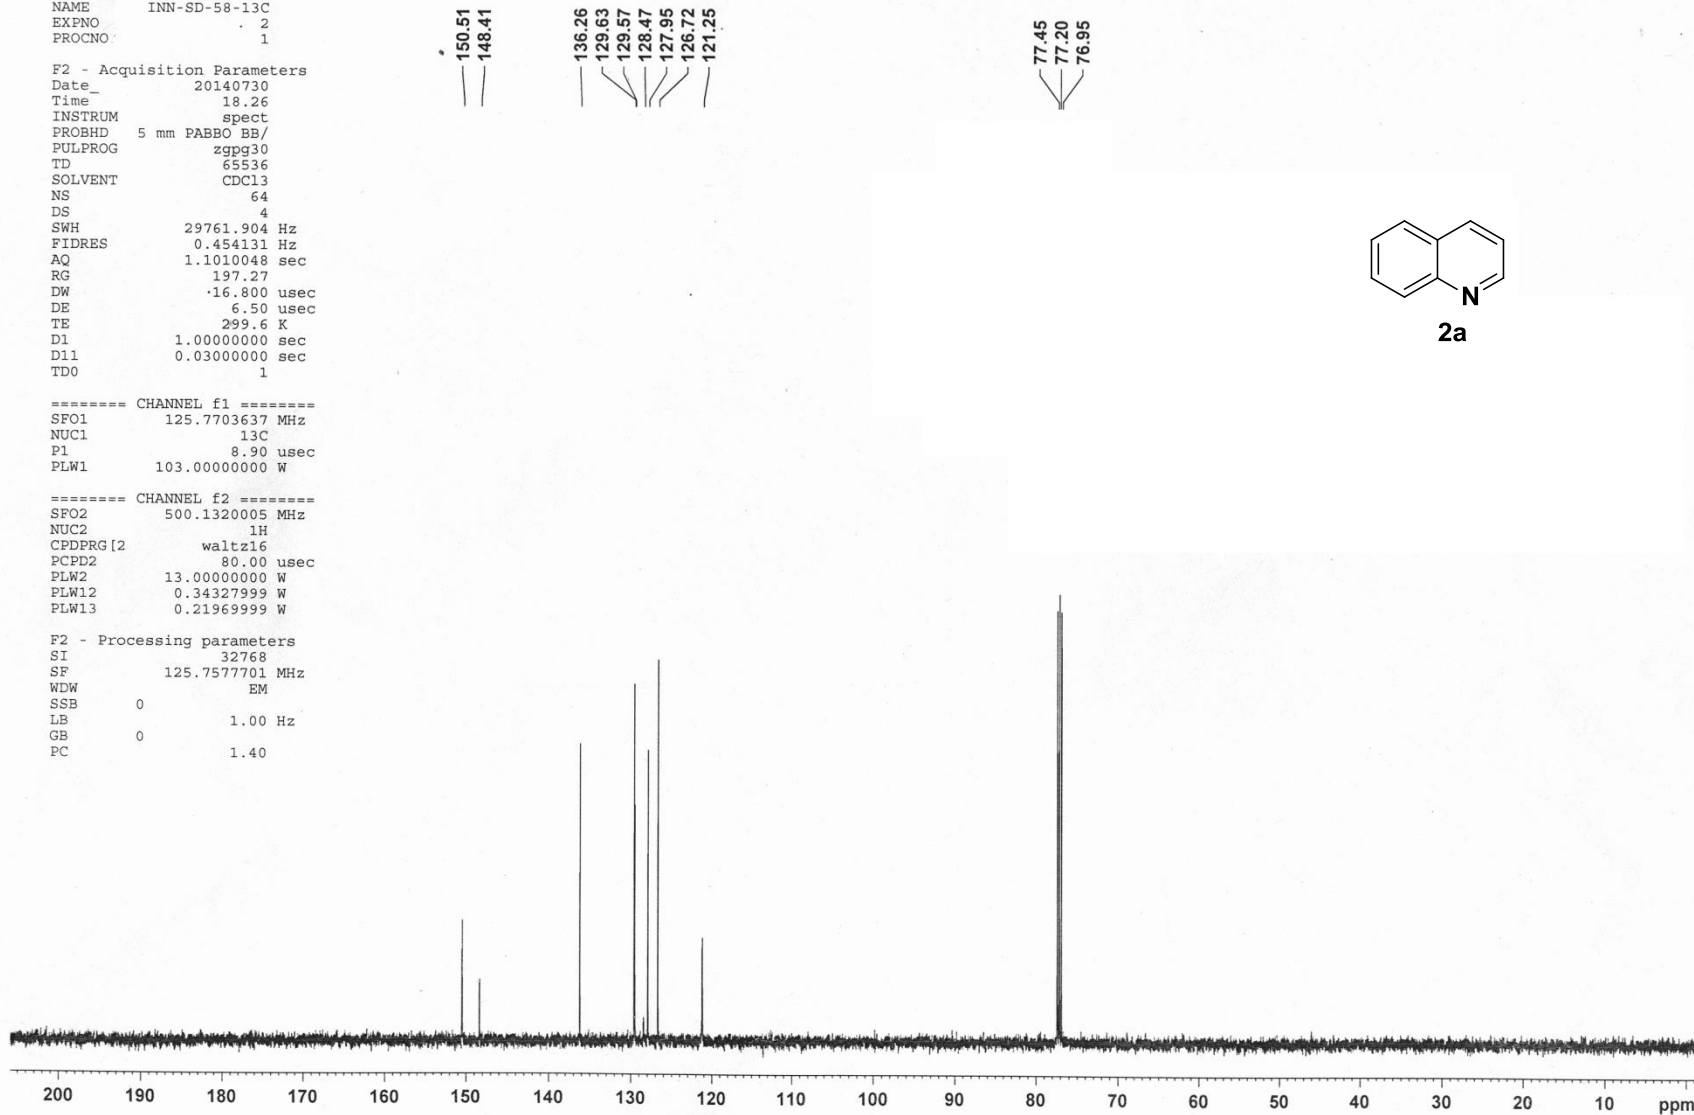

Figure S2.  $^{13}\text{C}$  NMR Spectrum of 2a

Current Data Parameters  
NAME INN-SD-90-1H  
EXPNO 16  
PROCNO 1

F2 - Acquisition Parameters  
Date\_ 20140905  
Time\_ 22.25  
INSTRUM spect  
PROBHD 5 mm PABBO BB/  
PULPROG zg30  
TD 65536  
SOLVENT CDCl3  
NS 16  
DS 2  
SWH 10000.000 Hz  
FIDRES 0.152588 Hz  
AQ 3.2767999 sec  
RG 69.35  
DW 50.000 usec  
DE 6.50 usec  
TE 296.6 K  
D1 1.0000000 sec  
TDO 1

==== CHANNEL f1 =====  
SF01 500.1330885 MHz  
NUC1 1H  
F1 13.00 usec  
PLW1 13.0000000 W

F2 - Processing parameters  
SI 65536  
SF 500.1300120 MHz  
WDW EM  
SSB 0  
LB 0.30 Hz  
GB 0  
FC 1.00

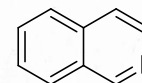

2b

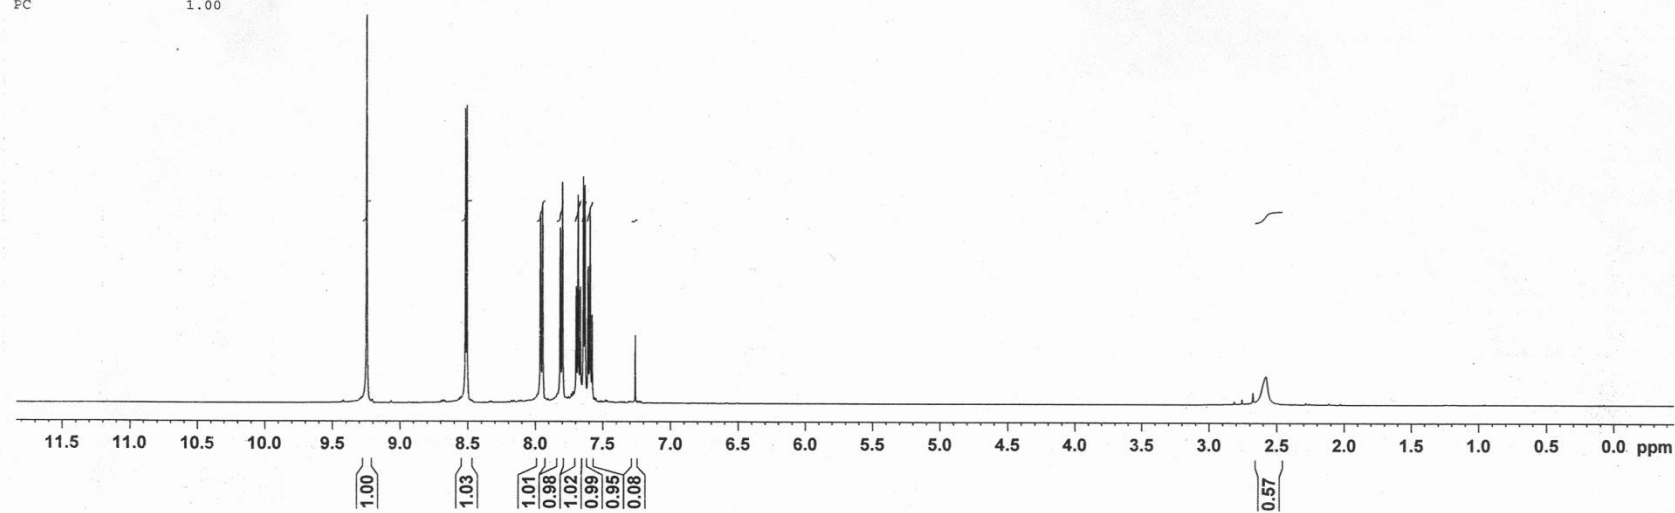

Figure S3. <sup>1</sup>H NMR Spectrum of 2b

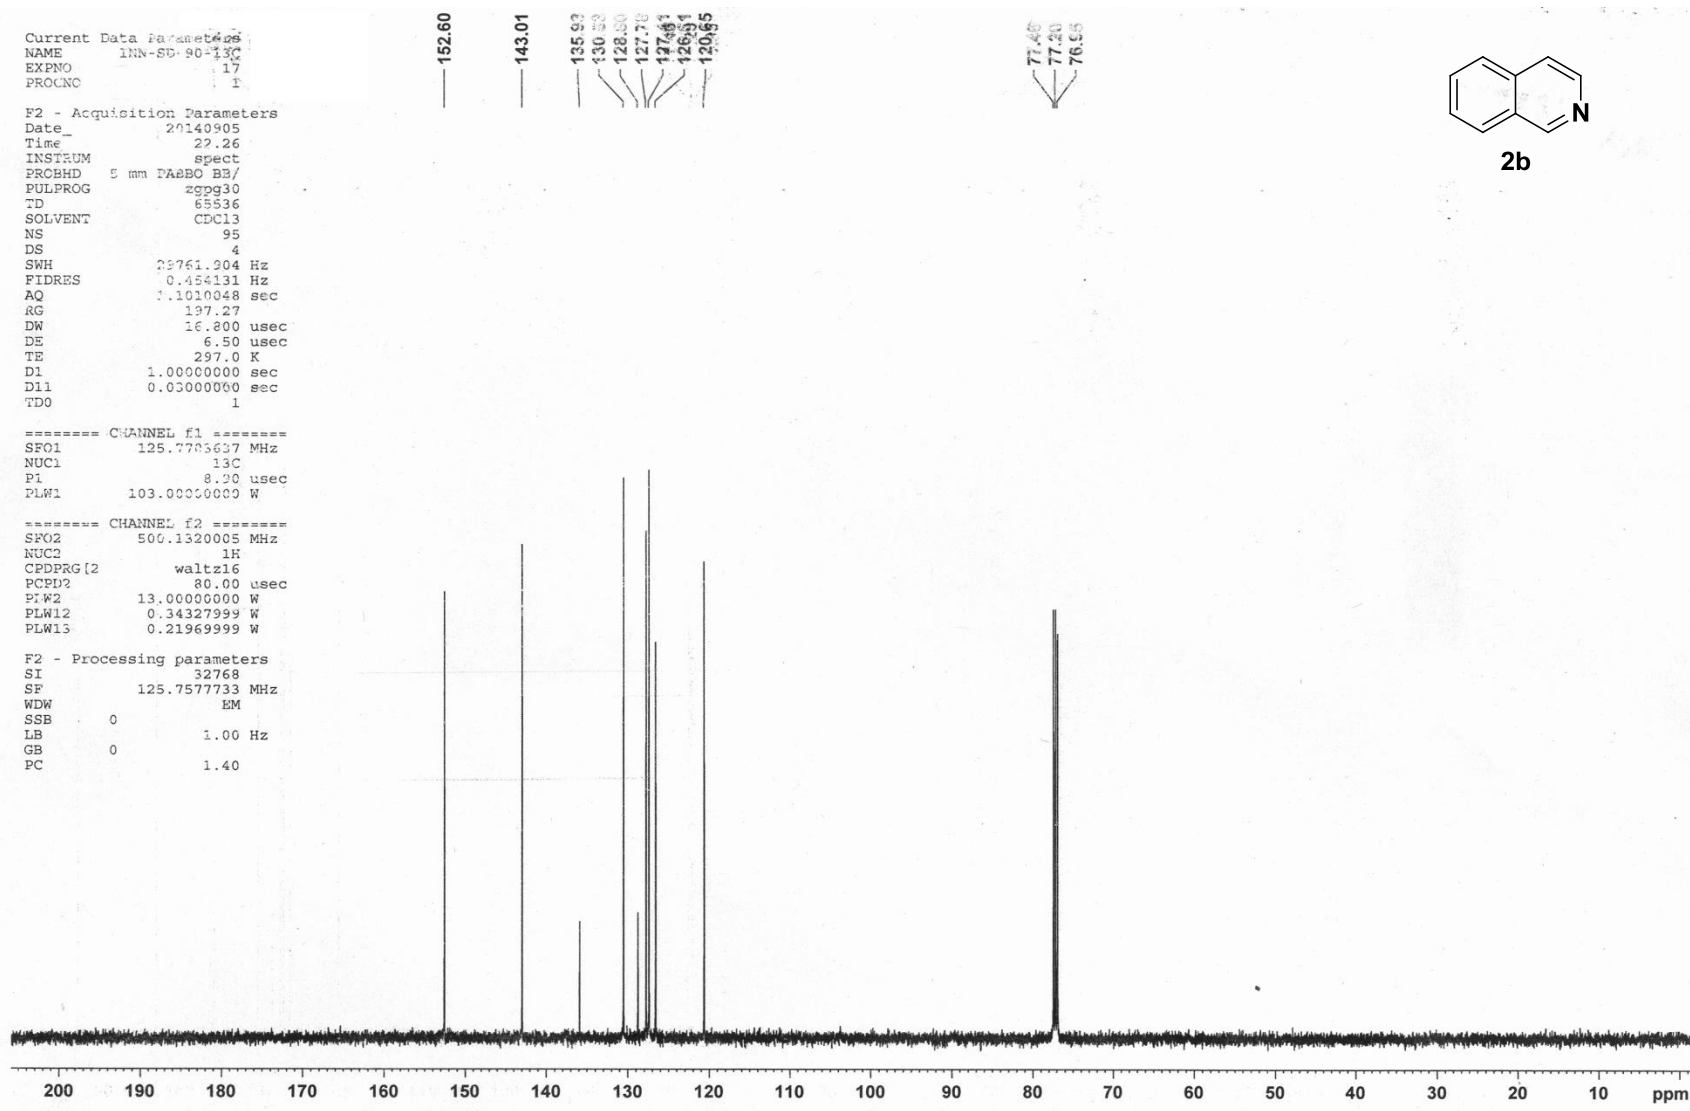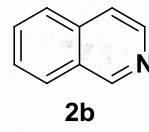

Figure S4. <sup>13</sup>C NMR Spectrum of 2b

|                        |                      |                   |                                                                               |                        |                      |
|------------------------|----------------------|-------------------|-------------------------------------------------------------------------------|------------------------|----------------------|
| Acquisition Time (sec) | 5.4657               | Comment           | 5 mm PABBO BB-1H Z-GRD Z824801/0109                                           | Date                   | 16 Oct 2014 16:26:08 |
| Date Stamp             | 16 Oct 2014 16:26:08 | File Name         | \\labies\Bitec-s\partages\scbm\SMACB_RMNTritium\data\tritium\nmr\SD-py\10\fid |                        |                      |
| Frequency (MHz)        | 400.13               | Nucleus           | 1H                                                                            | Number of Transients   | 8                    |
| Original Points Count  | 32768                | Owner             | BRUKER                                                                        | Points Count           | 32768                |
| Receiver Gain          | 114.00               | SW(cyclical) (Hz) | 5995.20                                                                       | Solvent                | CHLOROFORM-d         |
| Spectrum Offset (Hz)   | 2400.0000            | Spectrum Type     | STANDARD                                                                      | Sweep Width (Hz)       | 5995.02              |
|                        |                      |                   |                                                                               | Temperature (degree C) | 25.400               |

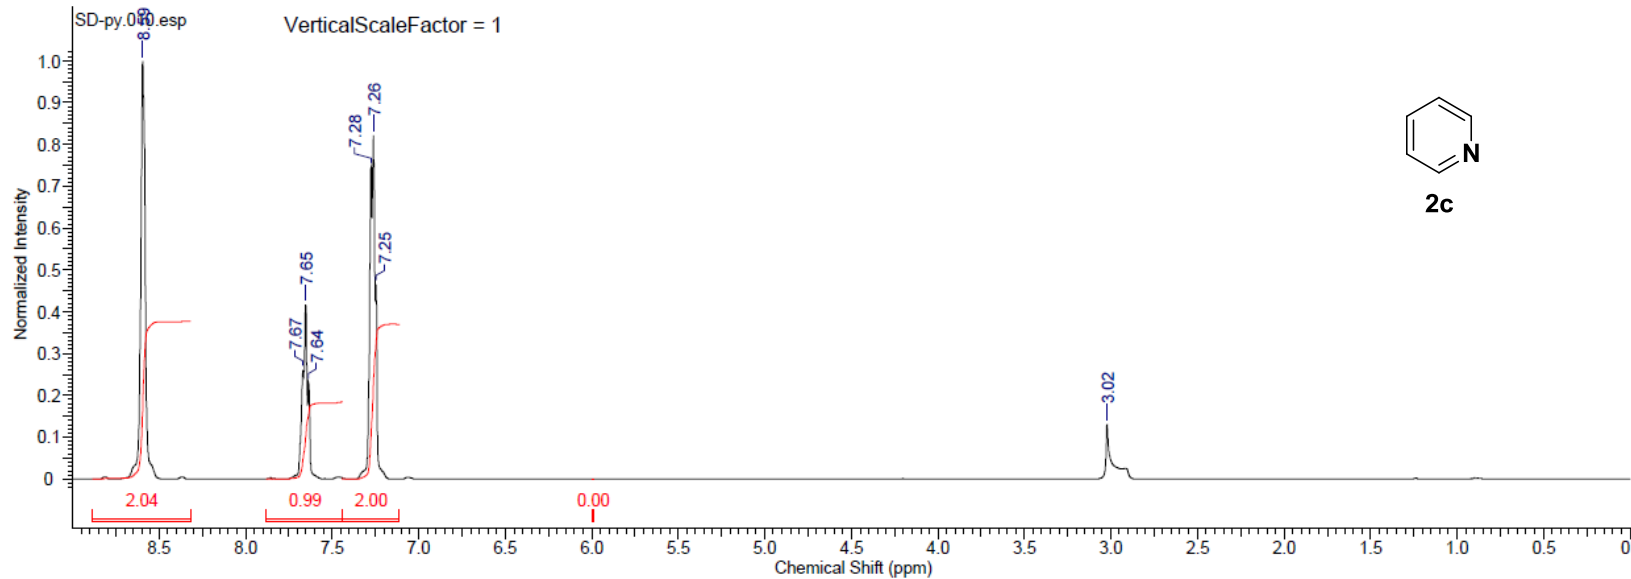Figure S5. <sup>1</sup>H NMR Spectrum of 2c

|                        |                      |                   |                                                                               |                      |                      |                        |        |
|------------------------|----------------------|-------------------|-------------------------------------------------------------------------------|----------------------|----------------------|------------------------|--------|
| Acquisition Time (sec) | 0.6521               | Comment           | 5 mm PABBO BB-1H Z-GRD Z824801/0109                                           | Date                 | 16 Oct 2014 16:43:12 |                        |        |
| Date Stamp             | 16 Oct 2014 16:43:12 | File Name         | \\labies\Bitec-s\partages\scbm\SMCB RMN\Tritium\data\tridium\nmr\SD-py\11\fid |                      |                      |                        |        |
| Frequency (MHz)        | 100.62               | Nucleus           | 13C                                                                           | Number of Transients | 512                  | Origin                 | spect  |
| Original Points Count  | 16384                | Owner             | BRUKER                                                                        | Points Count         | 16384                | Pulse Sequence         | zpgq30 |
| Receiver Gain          | 2896.30              | SW(cyclical) (Hz) | 25125.63                                                                      | Solvent              | CHLOROFORM-d         |                        |        |
| Spectrum Offset (Hz)   | 11570.4688           | Spectrum Type     | STANDARD                                                                      | Sweep Width (Hz)     | 25124.09             | Temperature (degree C) | 25.800 |

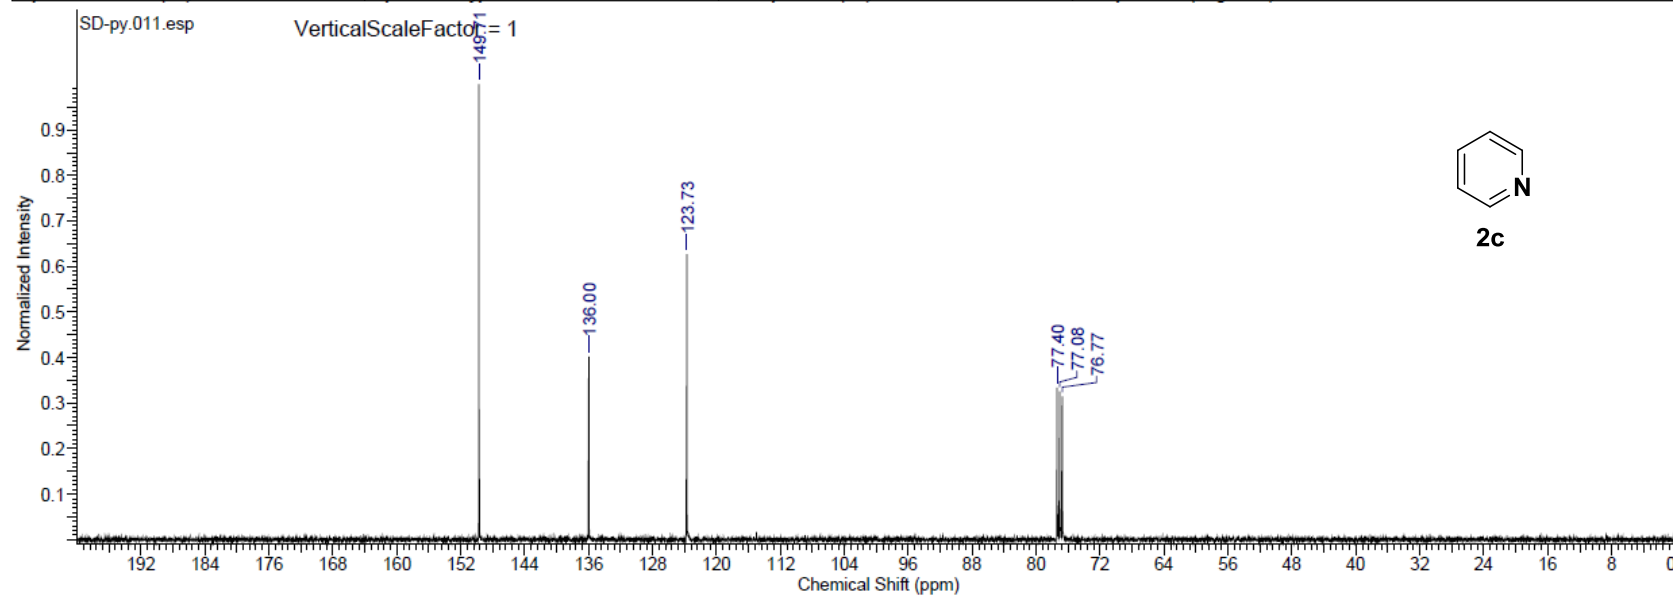Figure S6.  $^{13}\text{C}$  NMR Spectrum of 2c

NAME INN-SD-97-1H  
EXPNO 3  
PROCNO 1  
Date\_ 20140911  
Time\_ 19.46  
INSTRUM spect  
PROBHD 5 mm PABBO BB-  
PULPROG zg30  
TD 54274  
SOLVENT CDCl3  
NS 11  
DS 0  
SWH 8223.685 Hz  
FIDRES 0.151522 Hz  
AQ 3.2999091 sec  
RG 90.5  
DW 60.800 usec  
DE 6.50 usec  
TE 297.1 K  
D1 1.00000000 sec  
TDO 1

===== CHANNEL f1 =====  
NUC1 1H  
P1 14.75 usec  
PL1 -1.00 dB  
PL1W 10.56200695 W  
SFO1 400.1324710 MHz  
SI 32768  
SF 400.1300100 MHz  
WDW EM  
SSB 0  
LB 0.30 Hz  
GB 0  
PC 1.00

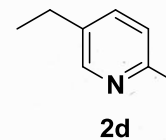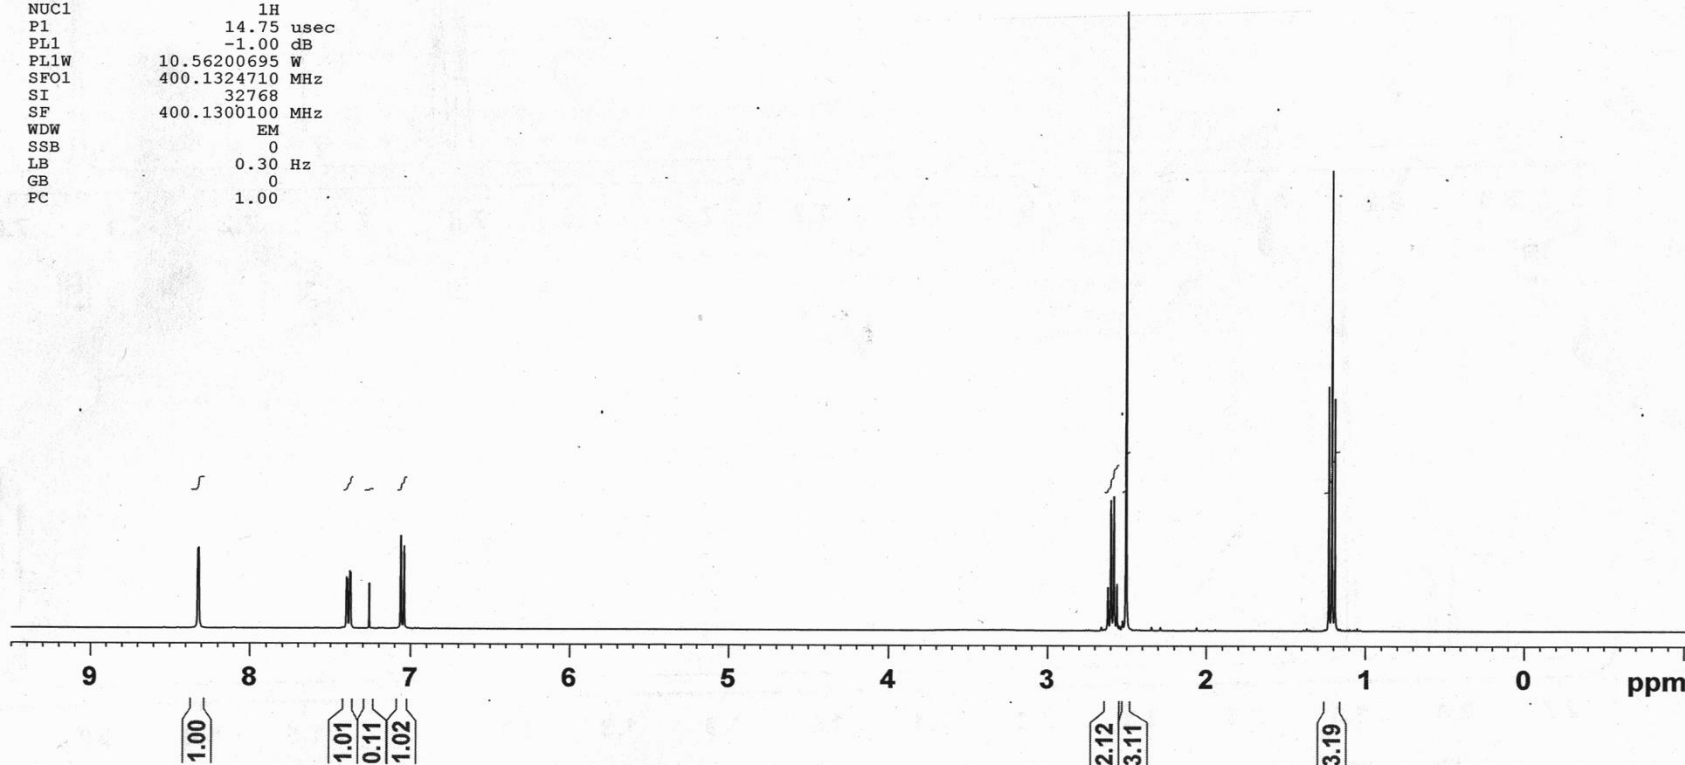

Figure S7. <sup>1</sup>H NMR Spectrum of 2d



```

NAME      INN-SD-97-13C
EXPNO    4
PROCNO   1
Date_    20140911
Time     19.48
INSTRUM  spect
PROBHD   5 mm PABBO BB-
PULPROG  zgpg30
TD       65536
SOLVENT  CDCl3
NS       100
DS       4
SWH      26041.666 Hz
FIDRES   0.397364 Hz
AQ       1.2583412 sec
RG       2050
DW       19.200 usec
DE       6.50 usec
TE       297.6 K
D1       1.00000000 sec
D11      0.03000000 sec
TD0      1

```

```

----- CHANNEL f1 -----
NUC1     13C
P1       8.50 usec
PL1      -2.00 dB
PL1W     56.53121948 W
SFO1     100.6238364 MHz

```

```

----- CHANNEL f2 -----
CPDPRG2  waltz16
NUC2     1H
PCPD2    80.00 usec
PL2      -1.00 dB
PL12     13.69 dB
PL13     14.50 dB
PL2W     10.56200695 W
PL12W    0.35871249 W
PL13W    0.29767781 W
SFO2     400.1316005 MHz
SI       32768
SF       100.6127536 MHz
WDW      EM
SSB      0
LB       1.00 Hz
GB       0
PC       1.40

```

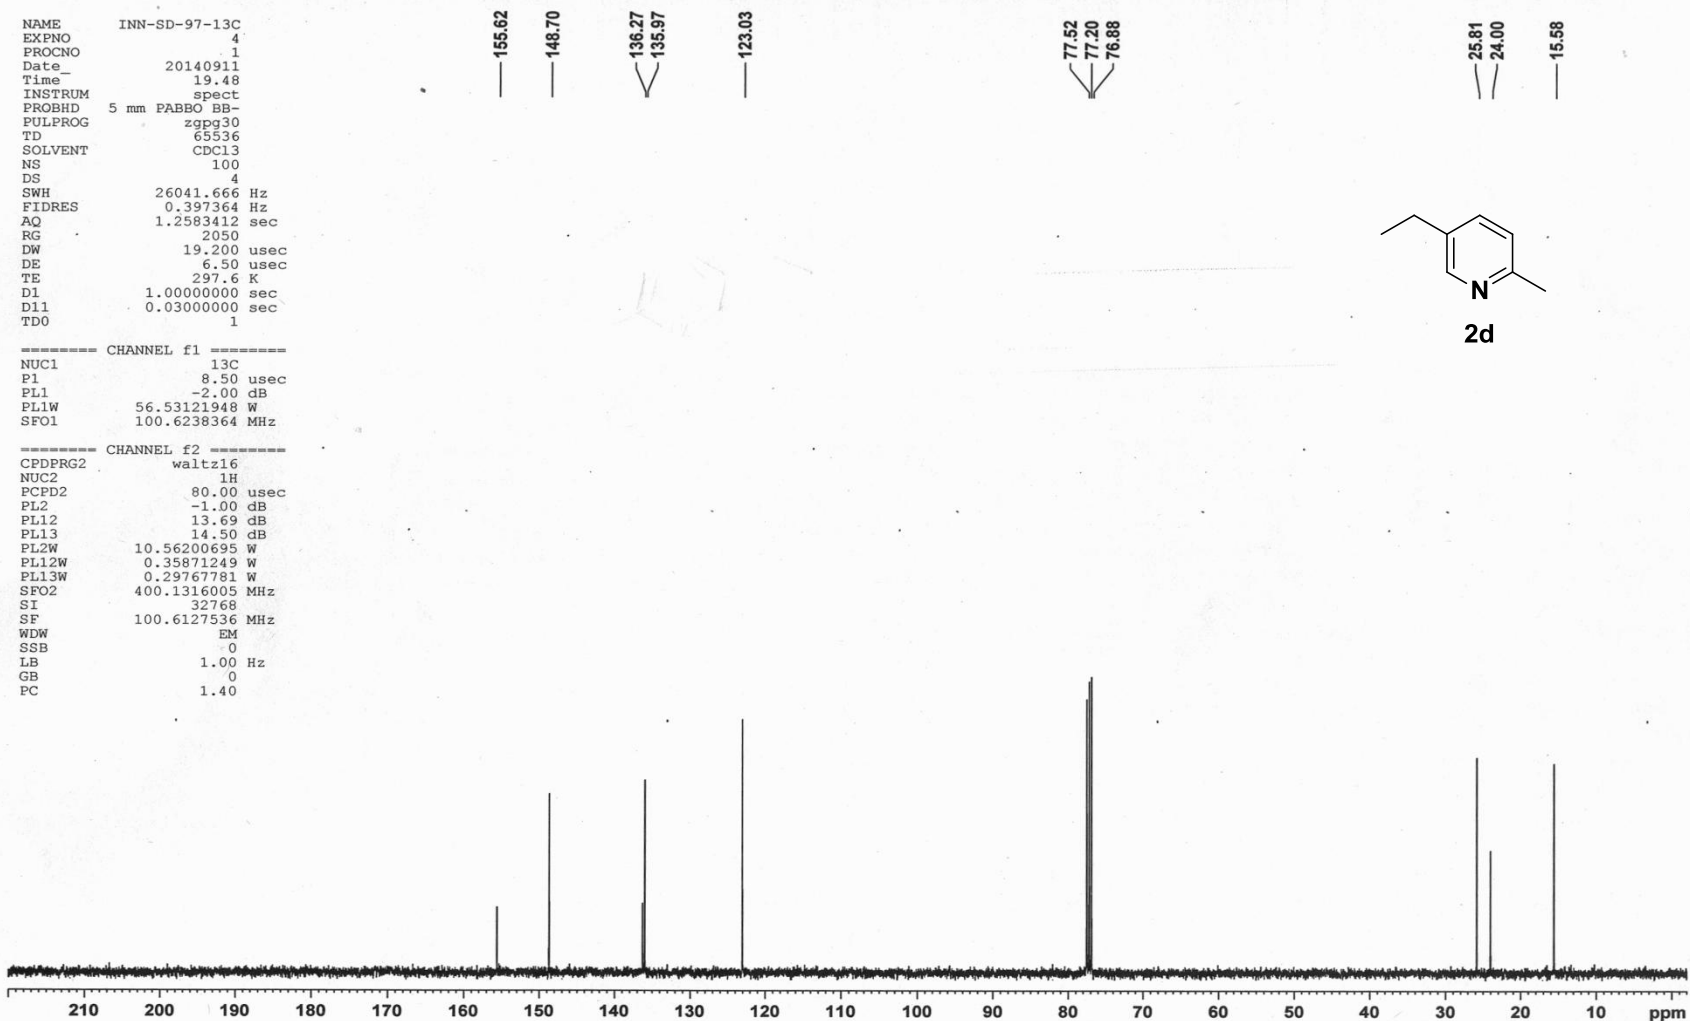

Figure S8. <sup>13</sup>C NMR Spectrum of 2d

|                        |                      |                   |                                                                                  |                        |                      |
|------------------------|----------------------|-------------------|----------------------------------------------------------------------------------|------------------------|----------------------|
| Acquisition Time (sec) | 5.4657               | Comment           | SD-161                                                                           | Date                   | 08 Oct 2014 11:36:00 |
| Date Stamp             | 08 Oct 2014 11:36:00 | File Name         | \\labies\Bitec-s\partages\scbm\SMMCB_RMNI\Tritium\data\tridium\nmr\SD-361\20\fid |                        |                      |
| Frequency (MHz)        | 400.13               | Nucleus           | <sup>1</sup> H                                                                   | Number of Transients   | 16                   |
| Original Points Count  | 32768                | Owner             | BRUKER                                                                           | Points Count           | 32768                |
| Receiver Gain          | 228.10               | SW(cyclical) (Hz) | 5995.20                                                                          | Solvent                | CHLOROFORM-d         |
| Spectrum Offset (Hz)   | 2400.0000            | Spectrum Type     | STANDARD                                                                         | Sweep Width (Hz)       | 5995.02              |
|                        |                      |                   |                                                                                  | Temperature (degree C) | 23.500               |

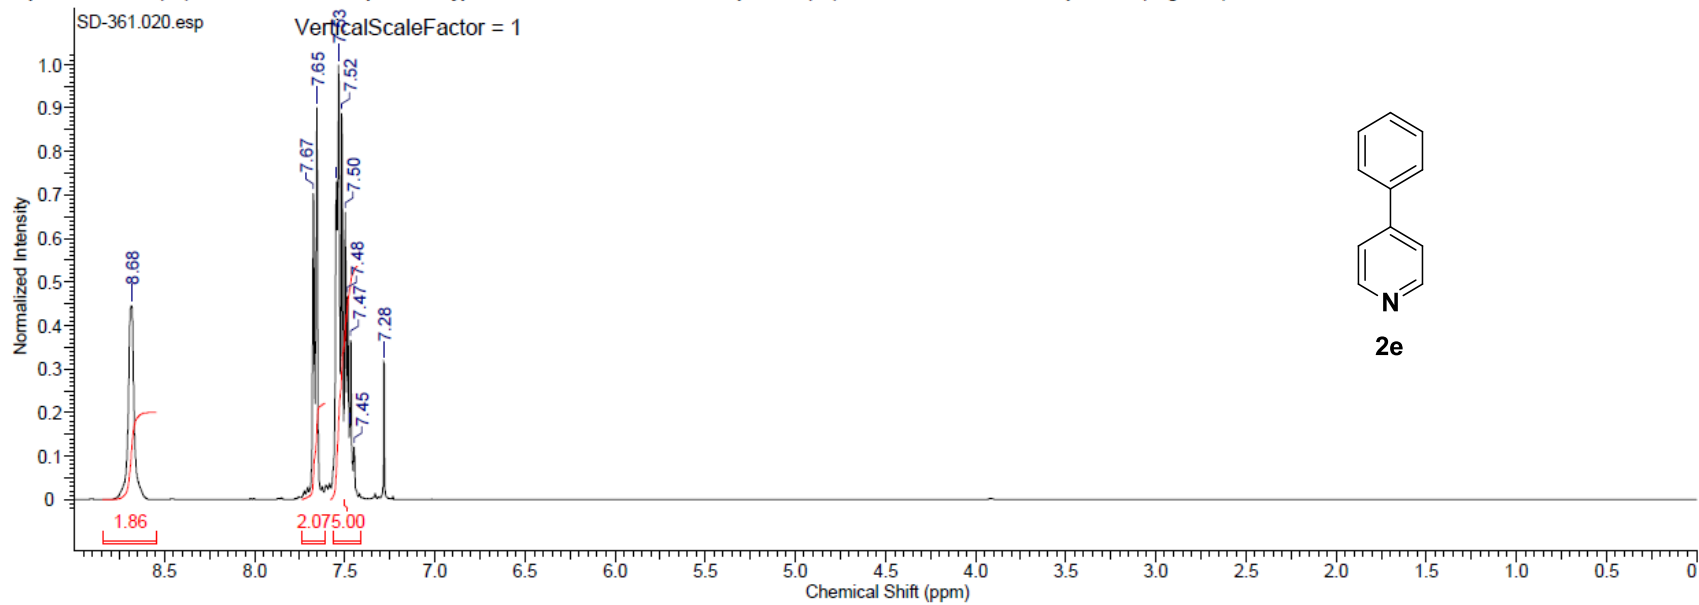

Figure S9. <sup>1</sup>H NMR Spectrum of 2e

|                        |                      |                   |                                                                                  |                        |                      |
|------------------------|----------------------|-------------------|----------------------------------------------------------------------------------|------------------------|----------------------|
| Acquisition Time (sec) | 0.6521               | Comment           | SD-361                                                                           | Date                   | 09 Oct 2014 07:30:40 |
| Date Stamp             | 09 Oct 2014 07:30:40 | File Name         | \\labies\l\bitec-s\partages\scbm\SMCB RMN\Tritium\data\tridium\nmr\SD-361\10\fid |                        |                      |
| Frequency (MHz)        | 100.62               | Nucleus           | <sup>13</sup> C                                                                  | Number of Transients   | 750                  |
| Original Points Count  | 16384                | Owner             | BRUKER                                                                           | Points Count           | 16384                |
| Receiver Gain          | 2896.30              | SW(cyclical) (Hz) | 25125.63                                                                         | Solvent                | CHLOROFORM-d         |
| Spectrum Offset (Hz)   | 11570.4688           | Spectrum Type     | STANDARD                                                                         | Sweep Width (Hz)       | 25124.09             |
|                        |                      |                   |                                                                                  | Temperature (degree C) | 24.700               |

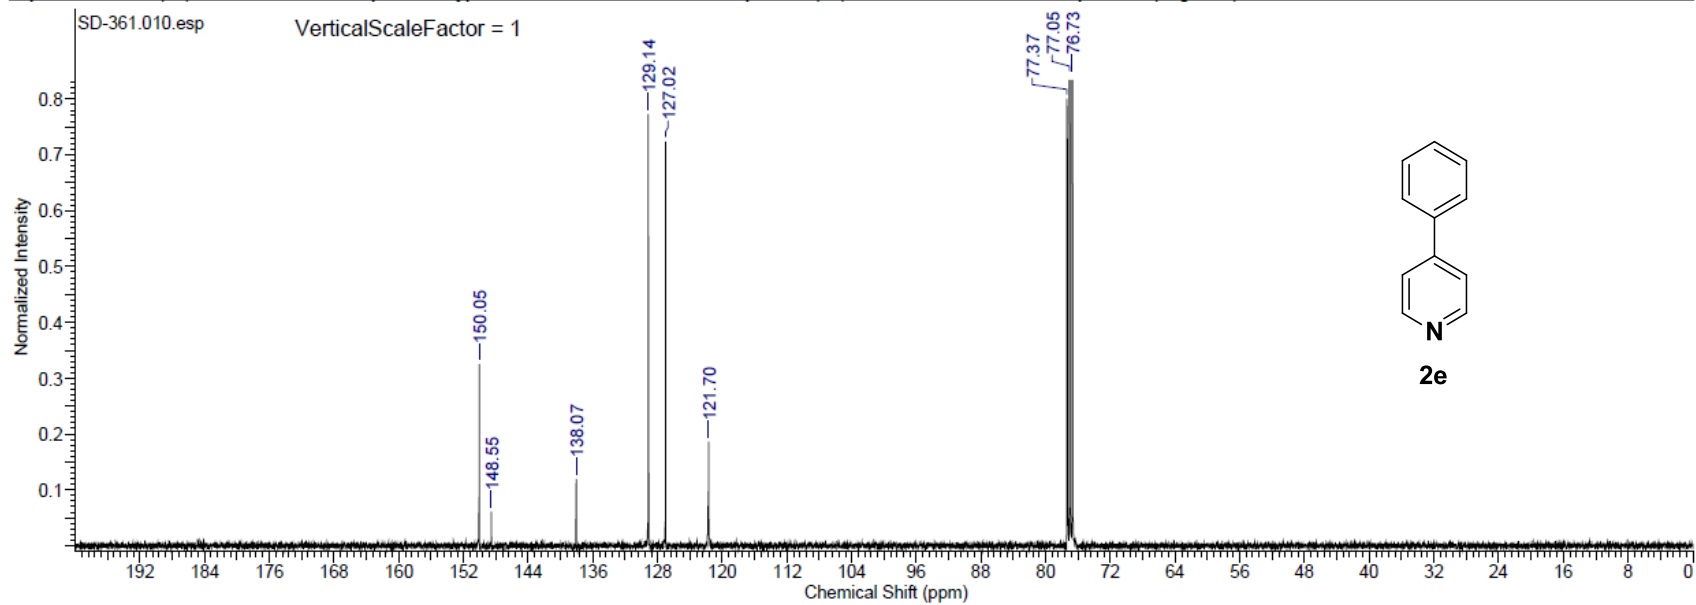

Figure S10. <sup>13</sup>C NMR Spectrum of 2e

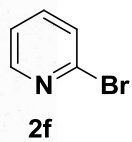

```

NAME      INN-SD-71-PURE-1H
EXPNO     1
PROCNO    1
Date_     20140902
Time_     18.11
INSTRUM   spect
PROBHD    5 mm PABBO BB-
PULPROG   zg30
TD        54274
SOLVENT   CDC13
NS        11
DS        0
SWH       8223.685 Hz
FIDRES    0.151522 Hz
AQ        3.2999091 sec
RG        32
DW        60.800 usec
DE        6.50 usec
TE        297.6 K
D1        1.00000000 sec
TD0       1

```

```

===== CHANNEL f1 =====
NUC1      1H
P1        14.75 usec
PL1       -1.00 dB
PL1W      10.56200695 W
SFO1      400.1324710 MHz
SI        32768
SF        400.1300099 MHz
WDW       EM
SSB       0
LB        0.30 Hz
GB        0
PC        1.00

```

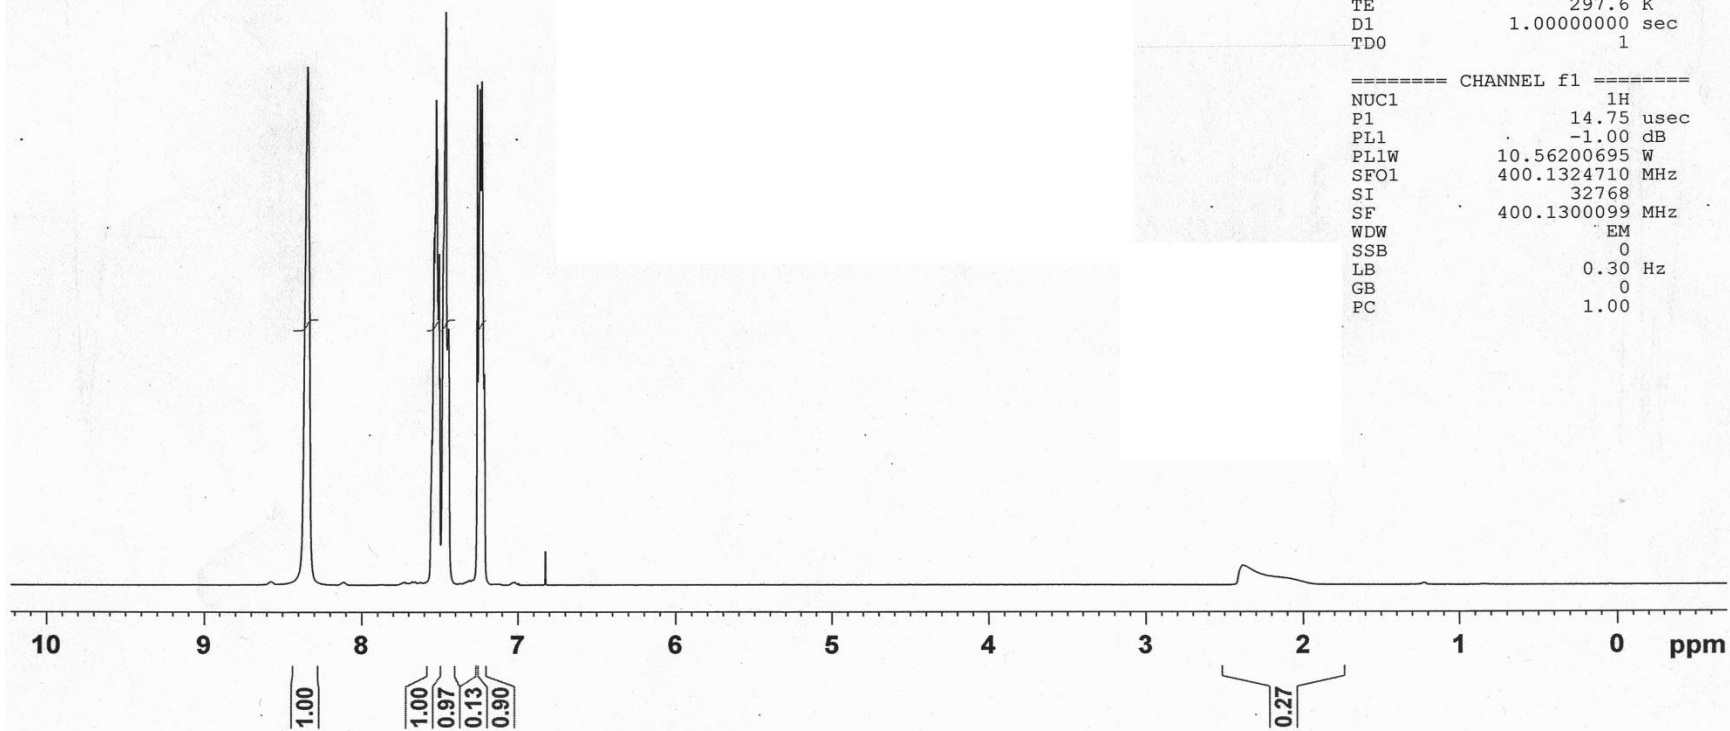

Figure S11. <sup>1</sup>H NMR Spectrum of 2f

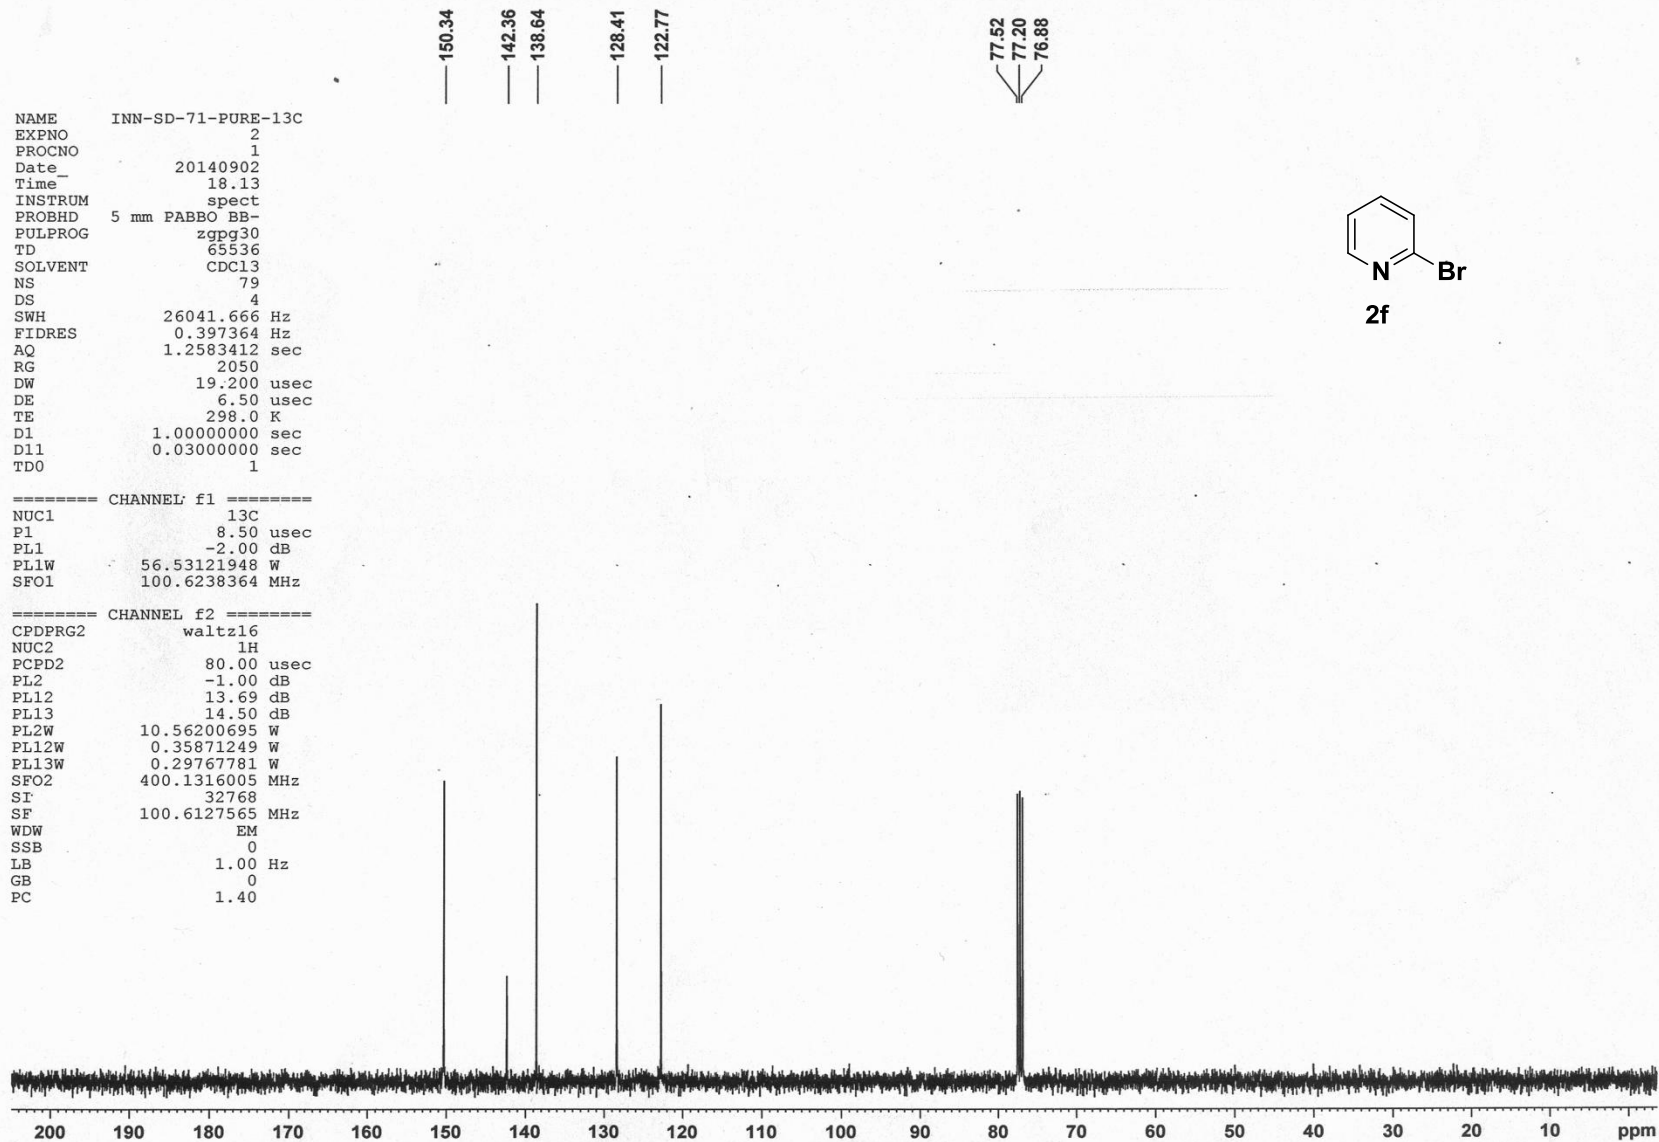

Figure S12. <sup>13</sup>C NMR Spectrum of 2f

NAME INN-SD-76-PURE-1H  
EXPNO 3  
PROCNO 1  
Date\_ 20140902  
Time\_ 18.19  
INSTRUM spect  
PROBHD 5 mm PABBO BB-  
PULPROG zg30  
TD 54274  
SOLVENT DMSO  
NS 16  
DS 0  
SWH 8223.685 Hz  
FIDRES 0.151522 Hz  
AQ 3.2999091 sec  
RG 32  
DW 60.800 usec  
DE 6.50 usec  
TE 297.5 K  
D1 1.00000000 sec  
TDO 1

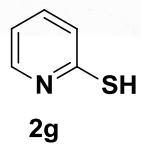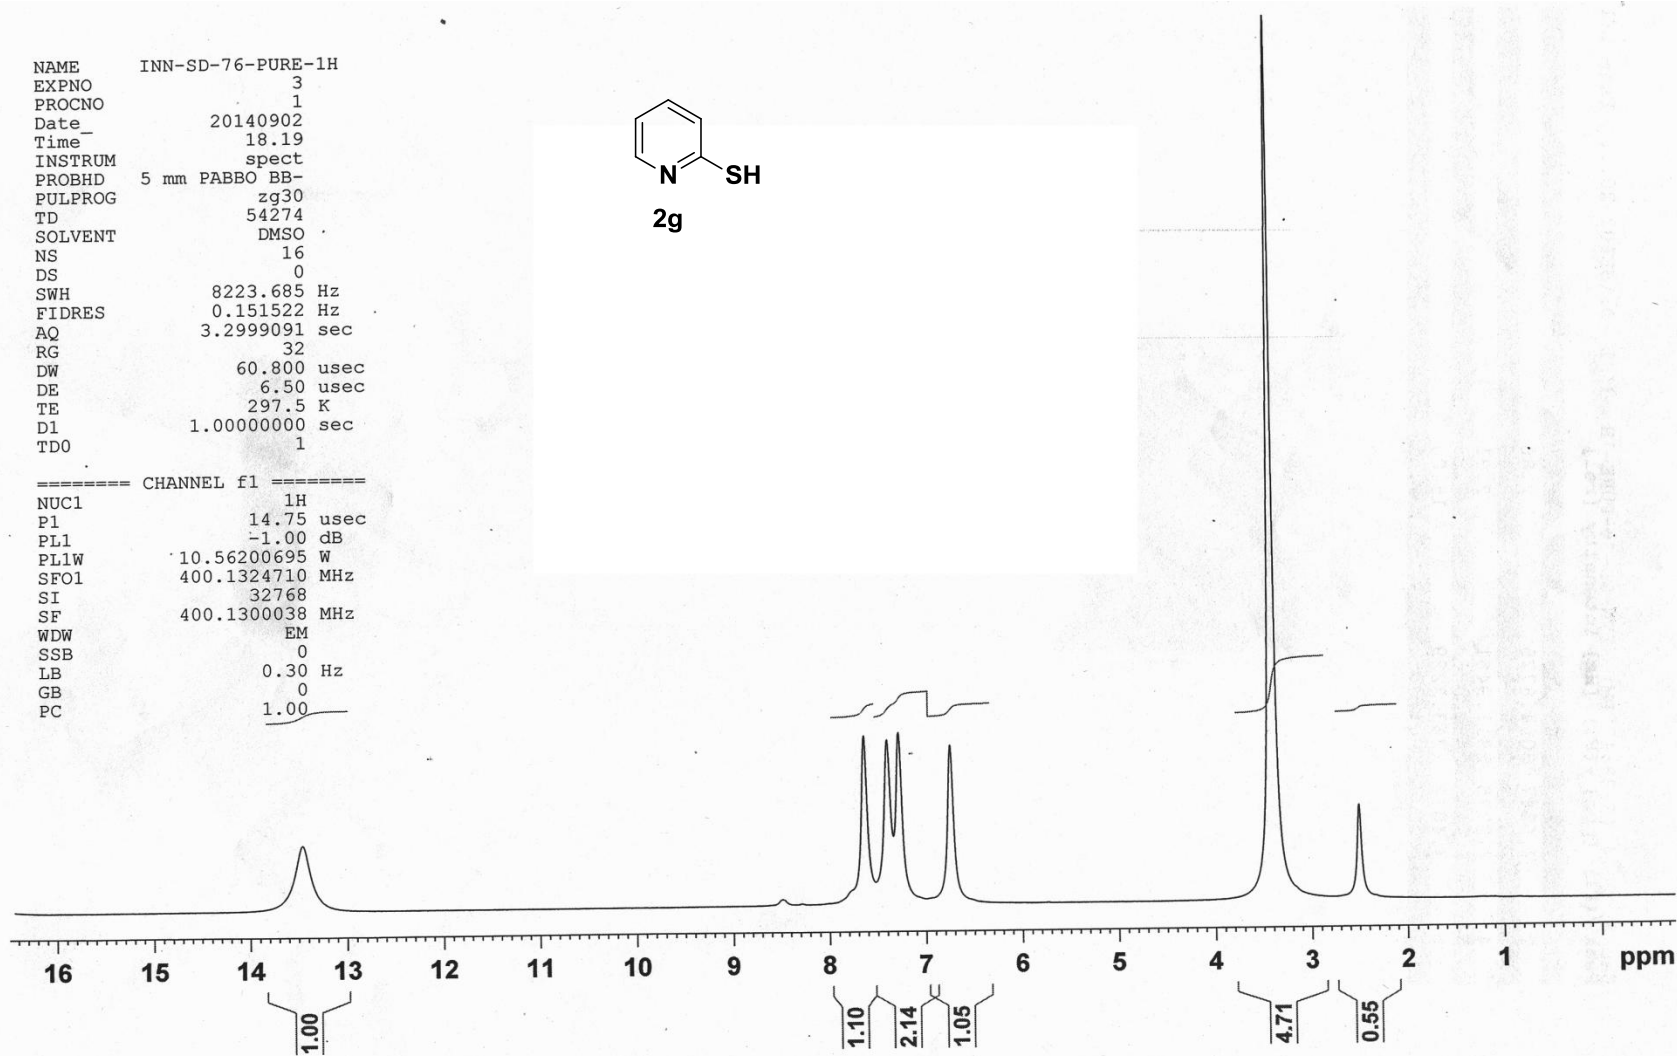

Figure S13. <sup>1</sup>H NMR Spectrum of 2g

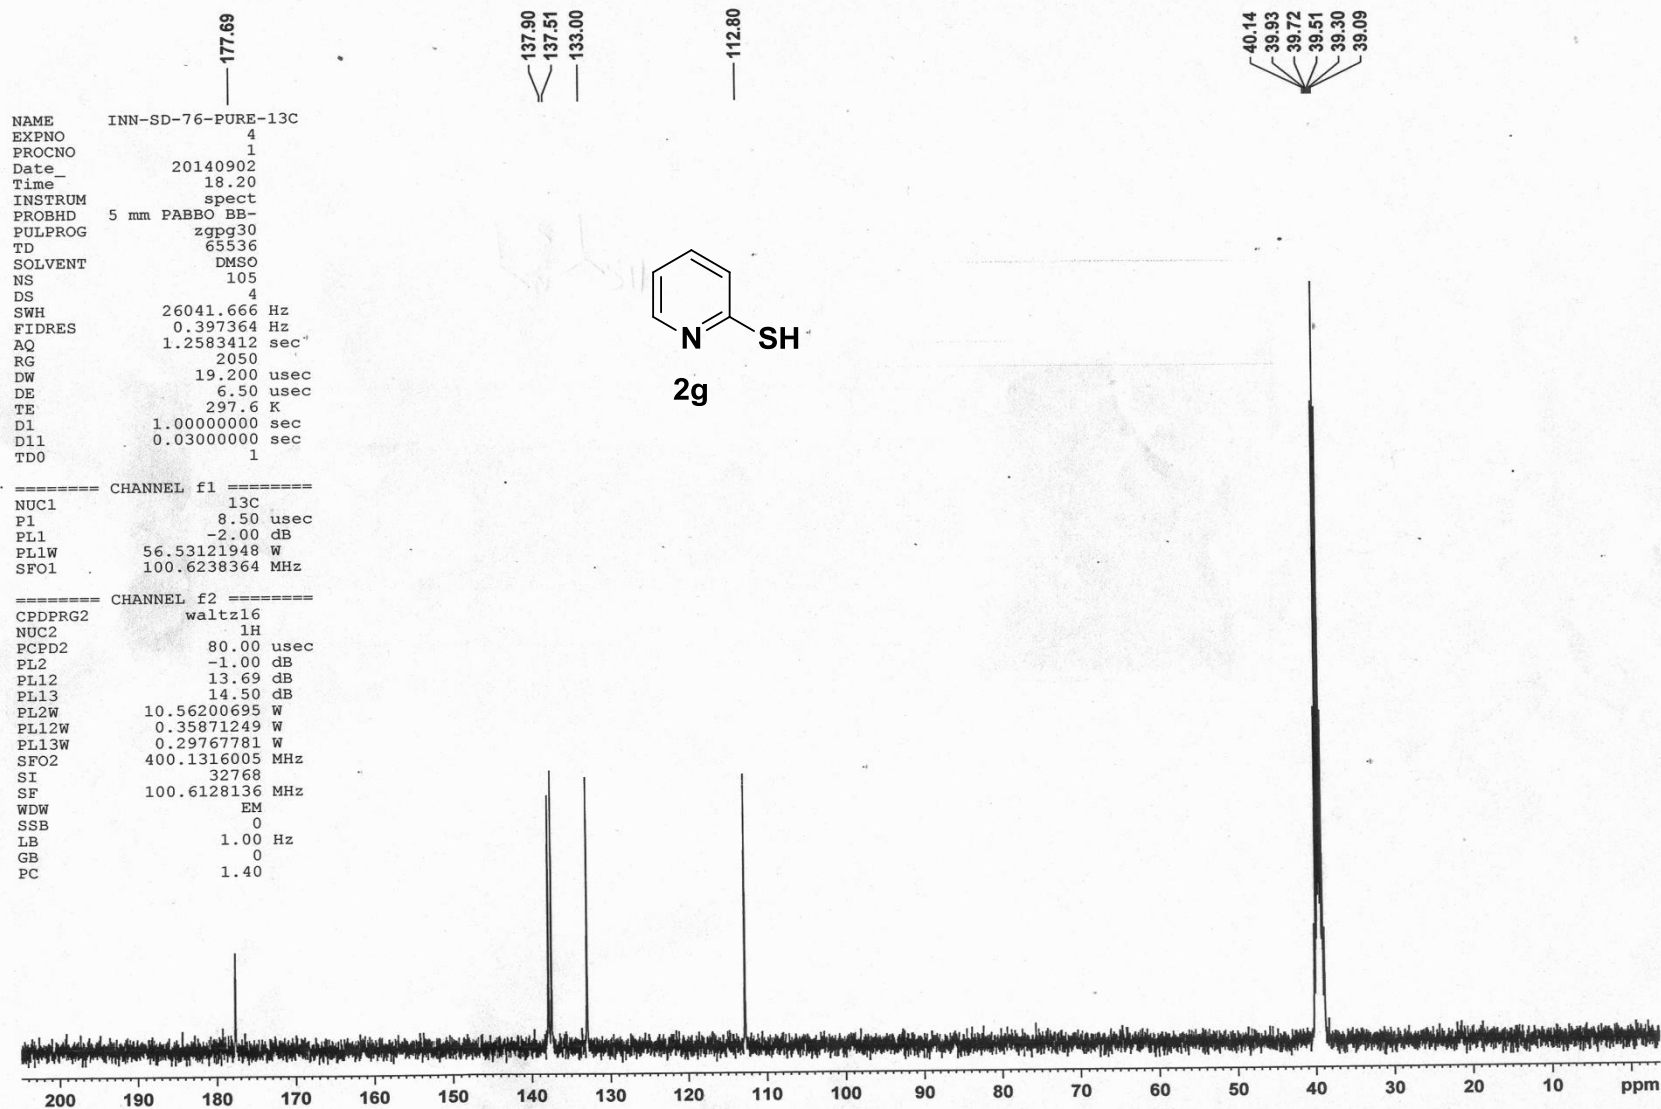

Figure S14. <sup>13</sup>C NMR Spectrum of 2g

|                        |                      |                      |                                                                                 |                      |                      |                  |         |                        |         |
|------------------------|----------------------|----------------------|---------------------------------------------------------------------------------|----------------------|----------------------|------------------|---------|------------------------|---------|
| Acquisition Time (sec) | 5.4657               | Comment              | SD-159                                                                          | Date                 | 08 Oct 2014 11:25:20 |                  |         |                        |         |
| Date Stamp             | 08 Oct 2014 11:25:20 | File Name            | \\labies\Bitec-s\partages\scbm\SMACB RMN\Tritium\data\tridium\nmr\SD-159\10\fid |                      |                      |                  |         |                        |         |
| Frequency (MHz)        | 400.13               | Nucleus              | <sup>1</sup> H                                                                  | Number of Transients | 16                   | Origin           | spect   | Original Points Count  | 32768   |
| Owner                  | BRUKER               | Points Count         | 32768                                                                           | Pulse Sequence       | zq45                 | Receiver Gain    | 228.10  | SW(cyclical) (Hz)      | 5995.20 |
| Solvent                | DMSO-d6              | Spectrum Offset (Hz) | 2400.0000                                                                       | Spectrum Type        | STANDARD             | Sweep Width (Hz) | 5995.02 | Temperature (degree C) | 27.000  |

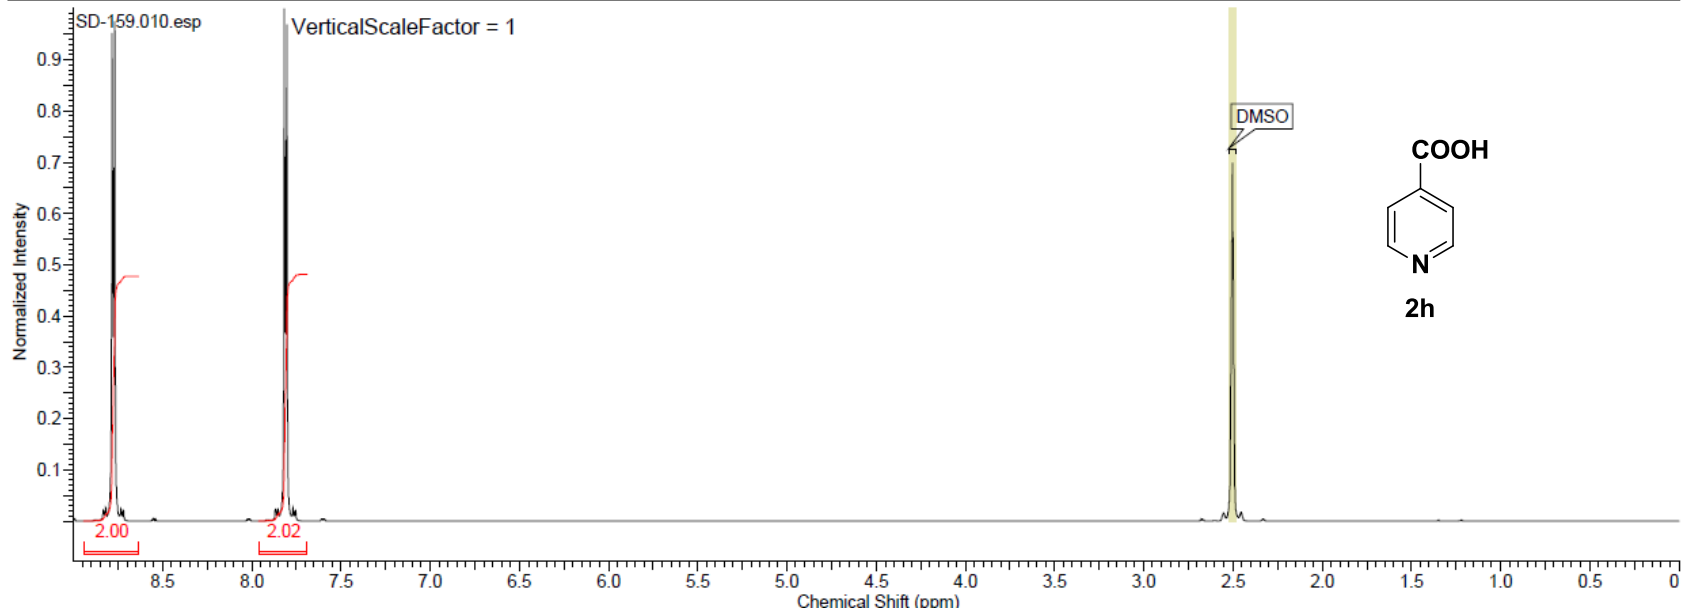

Figure S15. <sup>1</sup>H NMR Spectrum of 2h



|                        |                      |                        |                                                                                  |                      |                      |
|------------------------|----------------------|------------------------|----------------------------------------------------------------------------------|----------------------|----------------------|
| Acquisition Time (sec) | 0.6521               | Comment                | SD-359                                                                           | Date                 | 09 Oct 2014 06:33:04 |
| Date Stamp             | 09 Oct 2014 06:33:04 | File Name              | \\labies\Bitec-s\partages\scbm\SMNCB_RMNI\tritium\data\tritium\nmr\SD-359\10\fid |                      |                      |
| Frequency (MHz)        | 100.62               | Nucleus                | <sup>13</sup> C                                                                  | Number of Transients | 750                  |
| Original Points Count  | 16384                | Owner                  | BRUKER                                                                           | Points Count         | 16384                |
| Receiver Gain          | 2896.30              | SW(cyclical) (Hz)      | 25125.63                                                                         | Solvent              | DMSO-d6              |
| Spectrum Type          | STANDARD             | Sweep Width (Hz)       | 25124.09                                                                         | Spectrum Offset (Hz) | 11570.4688           |
|                        |                      | Temperature (degree C) | 27.000                                                                           |                      |                      |

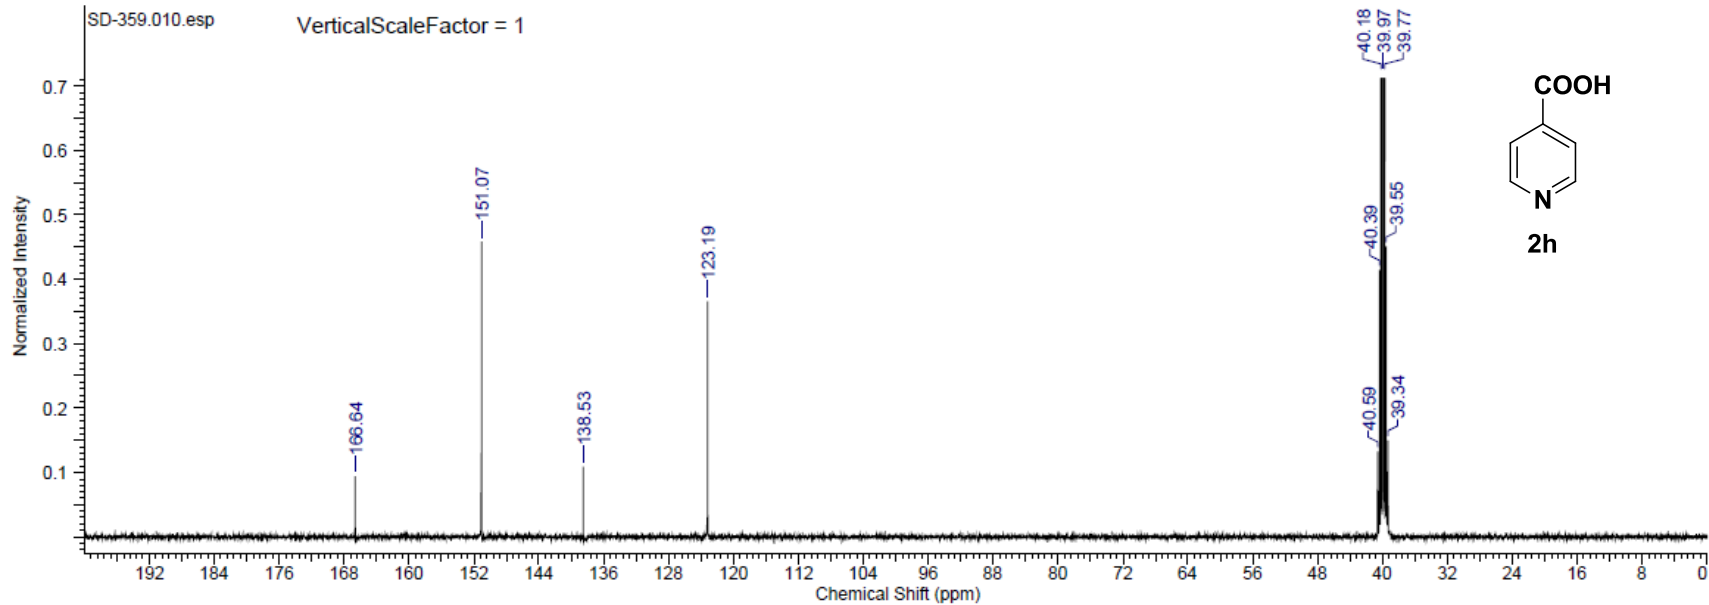

Figure S16. <sup>13</sup>C NMR Spectrum of 2h

|                        |                      |                      |           |                      |                                                                                  |                  |                               |
|------------------------|----------------------|----------------------|-----------|----------------------|----------------------------------------------------------------------------------|------------------|-------------------------------|
| Acquisition Time (sec) | 5.4657               | Comment              | SD-360a   | Date                 | 09 Oct 2014 11:23:12                                                             |                  |                               |
| Date Stamp             | 09 Oct 2014 11:23:12 |                      |           | File Name            | \\labies\Bitec-s\partages\scbm\SMCB_RMNI\Tritium\data\tritium\nmr\SD-360a\10\fid |                  |                               |
| Frequency (MHz)        | 400.13               | Nucleus              | 1H        | Number of Transients | 16                                                                               | Origin           | spect                         |
| Owner                  | BRUKER               | Points Count         | 32768     | Pulse Sequence       | zg45                                                                             | Receiver Gain    | 228.10                        |
| Solvent                | DMSO-d6              | Spectrum Offset (Hz) | 2400.0000 | Spectrum Type        | STANDARD                                                                         | Sweep Width (Hz) | 5995.02                       |
|                        |                      |                      |           |                      |                                                                                  |                  | Temperature (degree C) 23.900 |

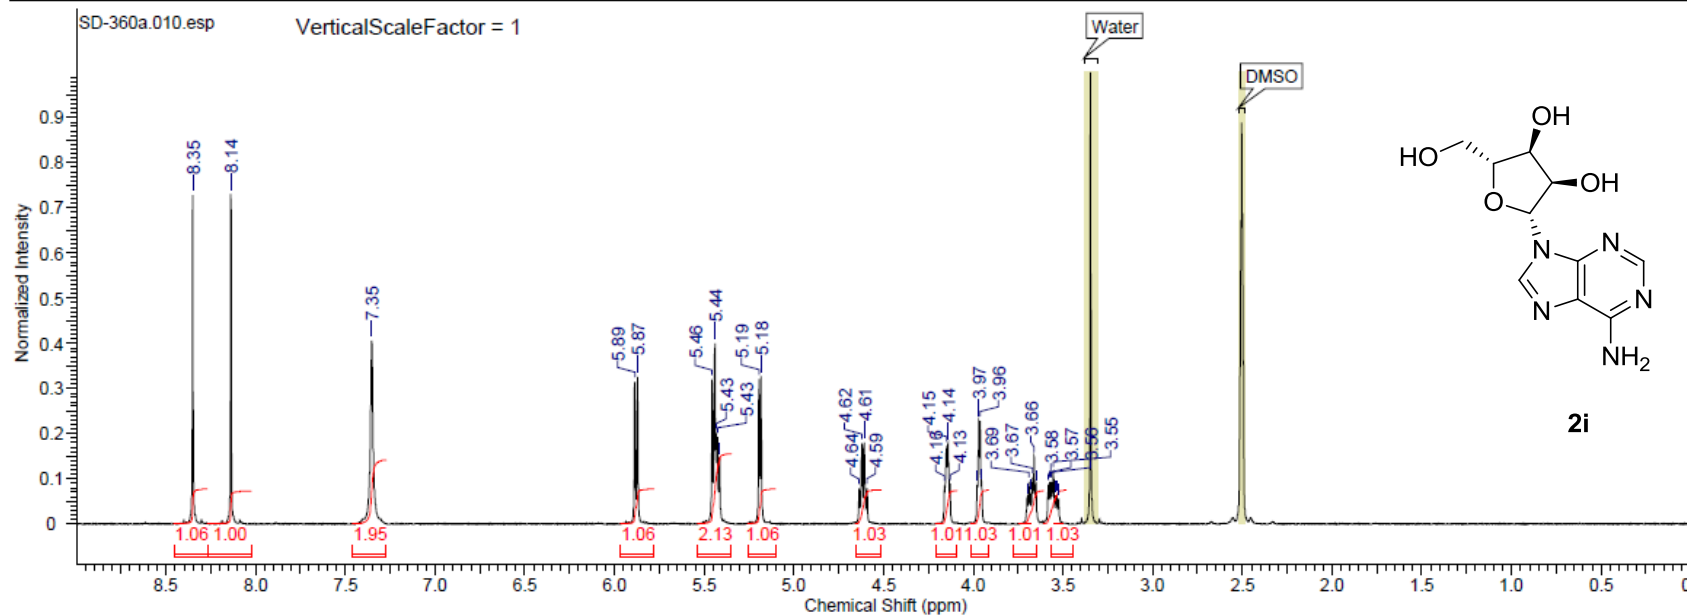

Figure S17.  $^1\text{H}$  NMR Spectrum of 2i

|                        |                      |                   |                                                                                   |                        |                      |
|------------------------|----------------------|-------------------|-----------------------------------------------------------------------------------|------------------------|----------------------|
| Acquisition Time (sec) | 0.6521               | Comment           | SD-360a                                                                           | Date                   | 09 Oct 2014 21:58:56 |
| Date Stamp             | 09 Oct 2014 21:58:56 | File Name         | \\labies\Bitec-s\partages\scbm\SMMCB_RMNI\Tritium\data\tridium\nmr\SD-360a\11\fid |                        |                      |
| Frequency (MHz)        | 100.62               | Nucleus           | 13C                                                                               | Number of Transients   | 700                  |
| Original Points Count  | 16384                | Owner             | BRUKER                                                                            | Points Count           | 16384                |
| Receiver Gain          | 2896.30              | SW(cyclical) (Hz) | 25125.63                                                                          | Solvent                | DMSO-d6              |
| Spectrum Type          | STANDARD             | Sweep Width (Hz)  | 25124.09                                                                          | Temperature (degree C) | 25.200               |
|                        |                      |                   |                                                                                   | Pulse Sequence         | zqpg30               |
|                        |                      |                   |                                                                                   | Spectrum Offset (Hz)   | 11570.4688           |

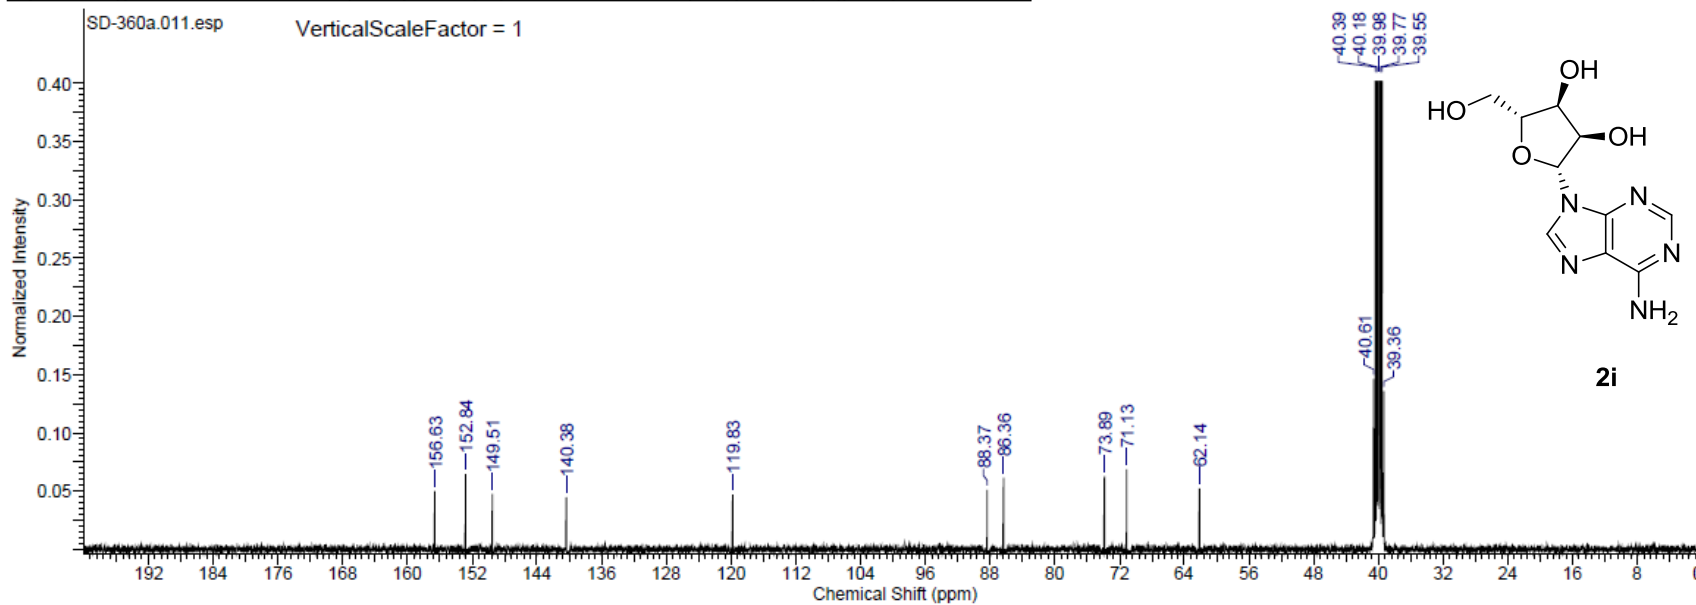

Figure S18. <sup>13</sup>C NMR Spectrum of 2i

|                        |                      |                   |                                                                                 |                      |                      |                        |        |
|------------------------|----------------------|-------------------|---------------------------------------------------------------------------------|----------------------|----------------------|------------------------|--------|
| Acquisition Time (sec) | 5.4657               | Comment           | SD-370                                                                          | Date                 | 15 Oct 2014 14:41:36 |                        |        |
| Date Stamp             | 15 Oct 2014 14:41:36 | File Name         | \\abies\Bitec-s\partages\scbm\SMMCB_RMNI\tritium\data\tritium\nmr\SD-370\10\fid |                      |                      |                        |        |
| Frequency (MHz)        | 400.13               | Nucleus           | 1H                                                                              | Number of Transients | 16                   | Origin                 | spect  |
| Original Points Count  | 32768                | Owner             | BRUKER                                                                          | Points Count         | 32768                | Pulse Sequence         | zg45   |
| Receiver Gain          | 101.60               | SW(cyclical) (Hz) | 5995.20                                                                         | Solvent              | CHLOROFORM-d         |                        |        |
| Spectrum Offset (Hz)   | 2400.0000            | Spectrum Type     | STANDARD                                                                        | Sweep Width (Hz)     | 5995.02              | Temperature (degree C) | 25.300 |

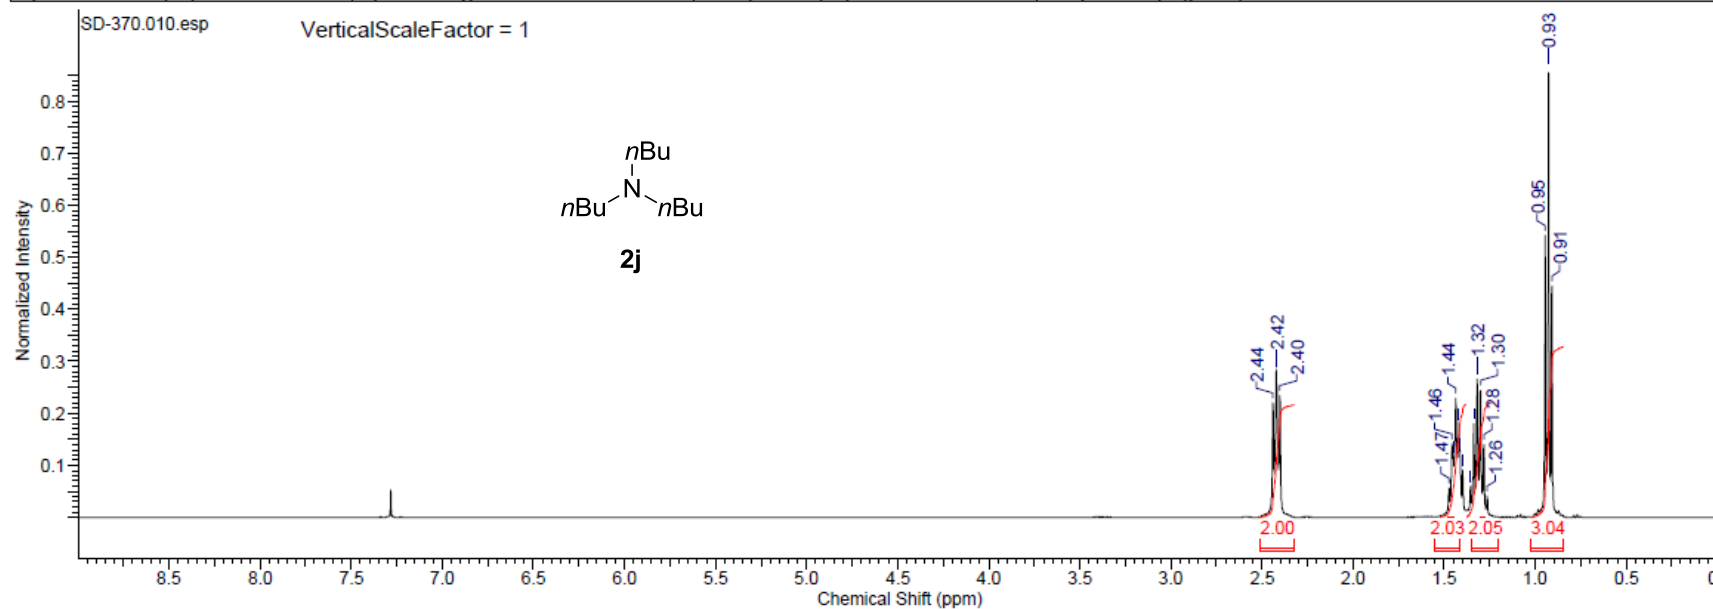Figure S19. <sup>1</sup>H NMR Spectrum of **2j**

|                        |                      |                   |                                                                                 |                      |                      |                        |        |
|------------------------|----------------------|-------------------|---------------------------------------------------------------------------------|----------------------|----------------------|------------------------|--------|
| Acquisition Time (sec) | 0.6521               | Comment           | SD-370                                                                          | Date                 | 15 Oct 2014 15:02:56 |                        |        |
| Date Stamp             | 15 Oct 2014 15:02:56 | File Name         | \\abies\Bitec-s\partages\scbm\SMACB_RMNI\tritium\data\tritium\nmr\SD-370\11\fid |                      |                      |                        |        |
| Frequency (MHz)        | 100.62               | Nucleus           | 13C                                                                             | Number of Transients | 400                  | Origin                 | spect  |
| Original Points Count  | 16384                | Owner             | BRUKER                                                                          | Points Count         | 16384                | Pulse Sequence         | zpgq30 |
| Receiver Gain          | 2896.30              | SW(cyclical) (Hz) | 25125.63                                                                        | Solvent              | CHLOROFORM-d         |                        |        |
| Spectrum Offset (Hz)   | 11570.4688           | Spectrum Type     | STANDARD                                                                        | Sweep Width (Hz)     | 25124.09             | Temperature (degree C) | 27.000 |

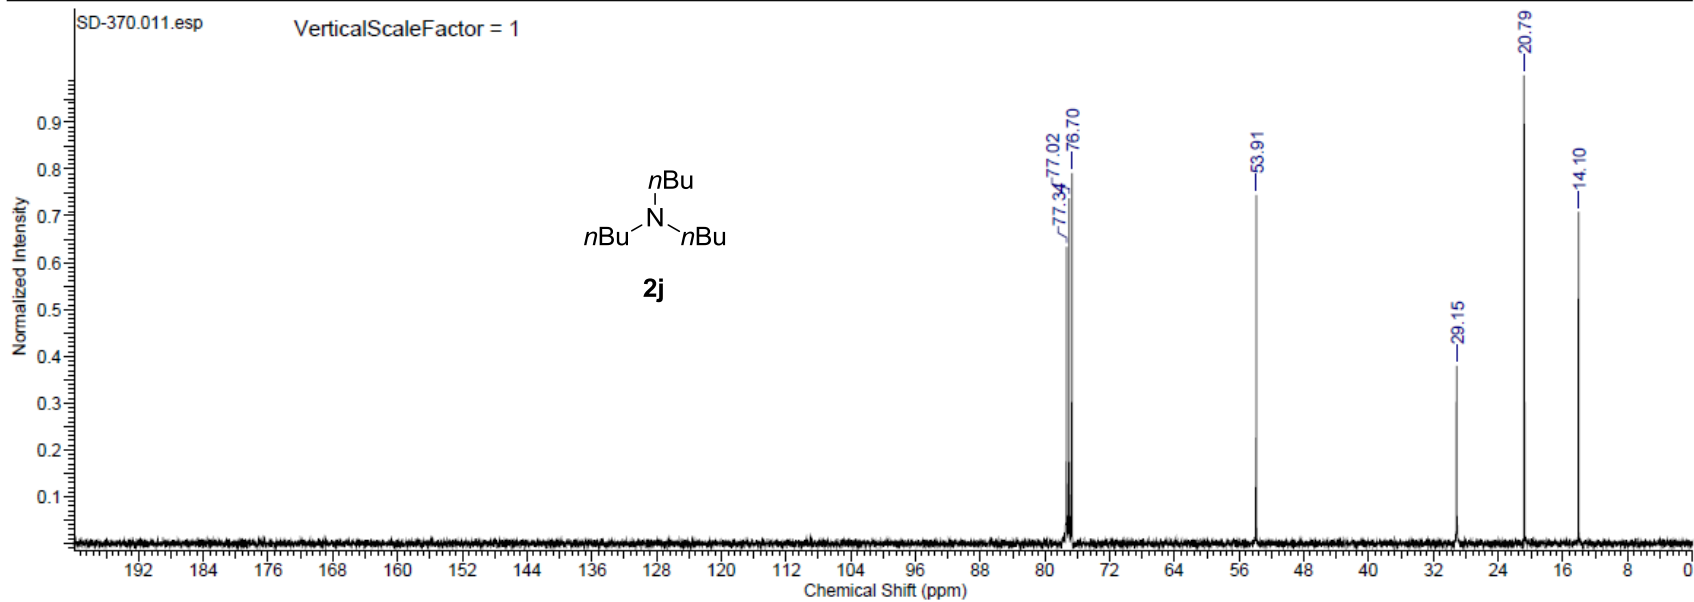Figure S20. <sup>13</sup>C NMR Spectrum of 2j

|                        |                      |                   |                                                                                 |                        |                      |
|------------------------|----------------------|-------------------|---------------------------------------------------------------------------------|------------------------|----------------------|
| Acquisition Time (sec) | 5.4657               | Comment           | 5 mm PABBO BB-1H Z-GRD Z824801/0109                                             | Date                   | 23 Mar 2015 08:49:20 |
| Date Stamp             | 23 Mar 2015 08:49:20 | File Name         | \\abies\iBiTec-S\PARTAGES\SCBMSMMCB_RMNI\Tritium\data\tridium\nmr\sd-nmM\10\fid |                        |                      |
| Frequency (MHz)        | 400.13               | Nucleus           | 1H                                                                              | Number of Transients   | 8                    |
| Original Points Count  | 32768                | Owner             | BRUKER                                                                          | Points Count           | 32768                |
| Receiver Gain          | 14.30                | SW(cyclical) (Hz) | 5995.20                                                                         | Solvent                | CHLOROFORM-d         |
| Spectrum Offset (Hz)   | 2400.0000            | Spectrum Type     | STANDARD                                                                        | Sweep Width (Hz)       | 5995.02              |
|                        |                      |                   |                                                                                 | Temperature (degree C) | 22.600               |

sd-nmM.010.esp

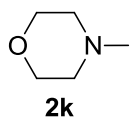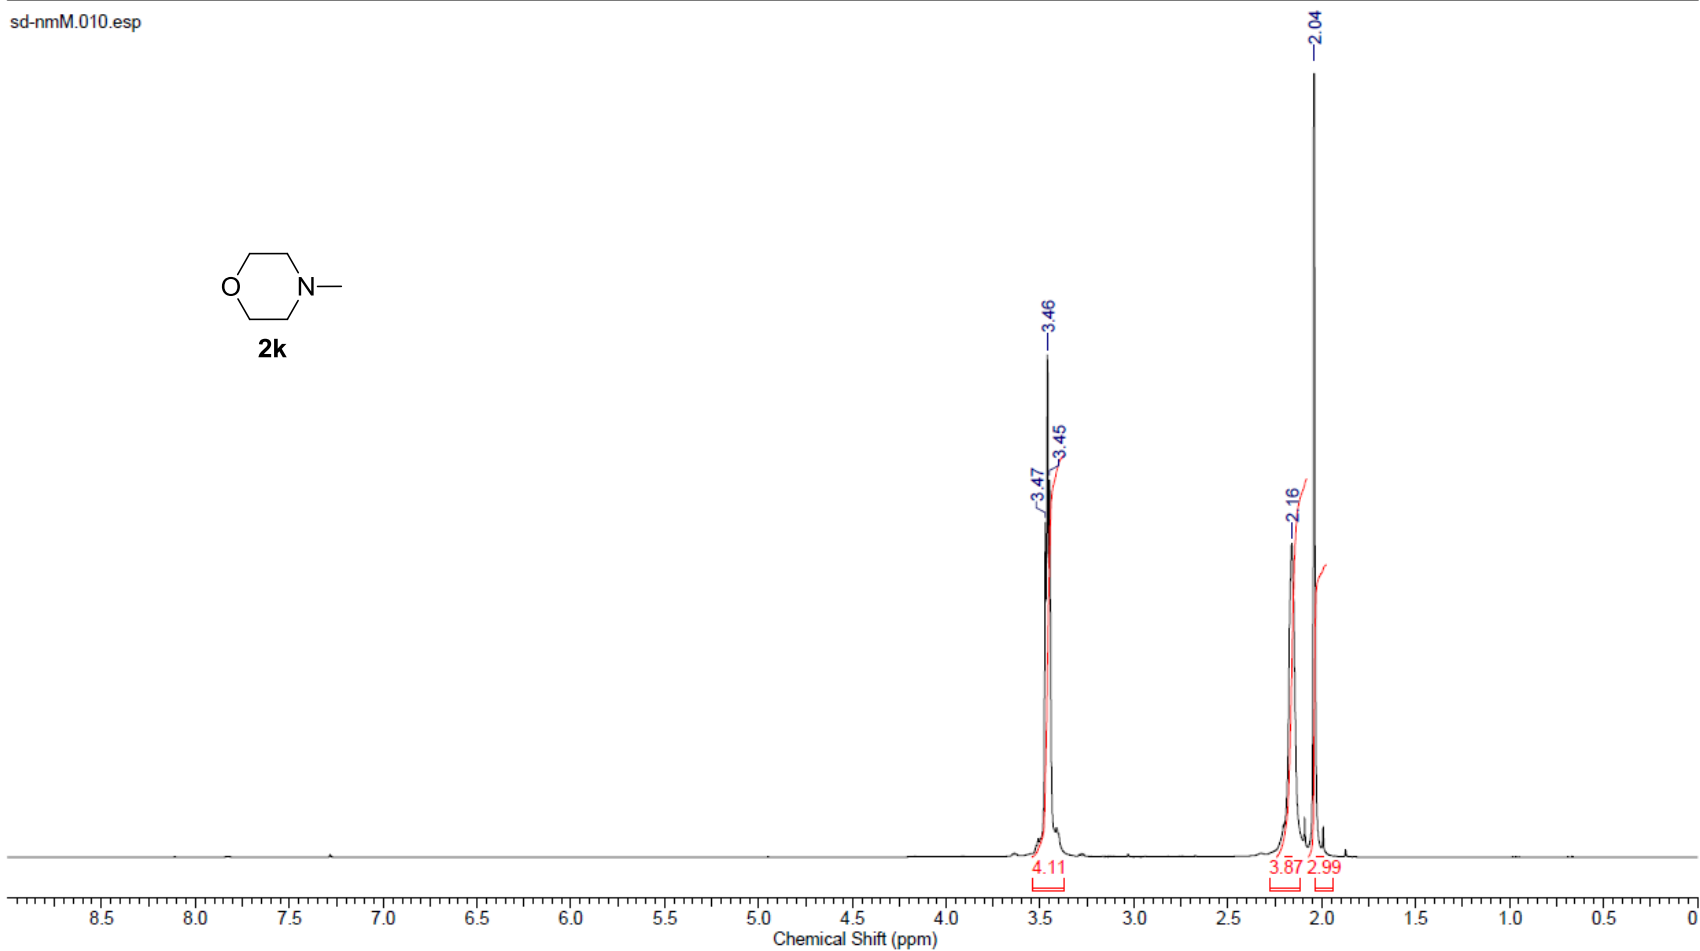

Figure S21. <sup>1</sup>H NMR Spectrum of 2k

|                        |                      |                   |                                                                                  |                        |                      |
|------------------------|----------------------|-------------------|----------------------------------------------------------------------------------|------------------------|----------------------|
| Acquisition Time (sec) | 0.6521               | Comment           | 5 mm PABBO BB-1H Z-GRD Z824801/0109                                              | Date                   | 23 Mar 2015 09:00:00 |
| Date Stamp             | 23 Mar 2015 09:00:00 | File Name         | \\labies\iBiTec-S\PARTAGES\SCBM\SMMCB_RMNI\Tritium\data\tridium\nmr\sd-nmM11\fid |                        |                      |
| Frequency (MHz)        | 100.62               | Nucleus           | 13C                                                                              | Number of Transients   | 126                  |
| Original Points Count  | 16384                | Owner             | BRUKER                                                                           | Points Count           | 16384                |
| Receiver Gain          | 2896.30              | SW(cyclical) (Hz) | 25125.63                                                                         | Solvent                | CHLOROFORM-d         |
| Spectrum Type          | STANDARD             | Sweep Width (Hz)  | 25124.09                                                                         | Temperature (degree C) | 27.000               |
|                        |                      |                   |                                                                                  | Pulse Sequence         | zgpg30               |
|                        |                      |                   |                                                                                  | Spectrum Offset (Hz)   | 11570.4688           |

sd-nmM.011.esp

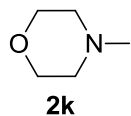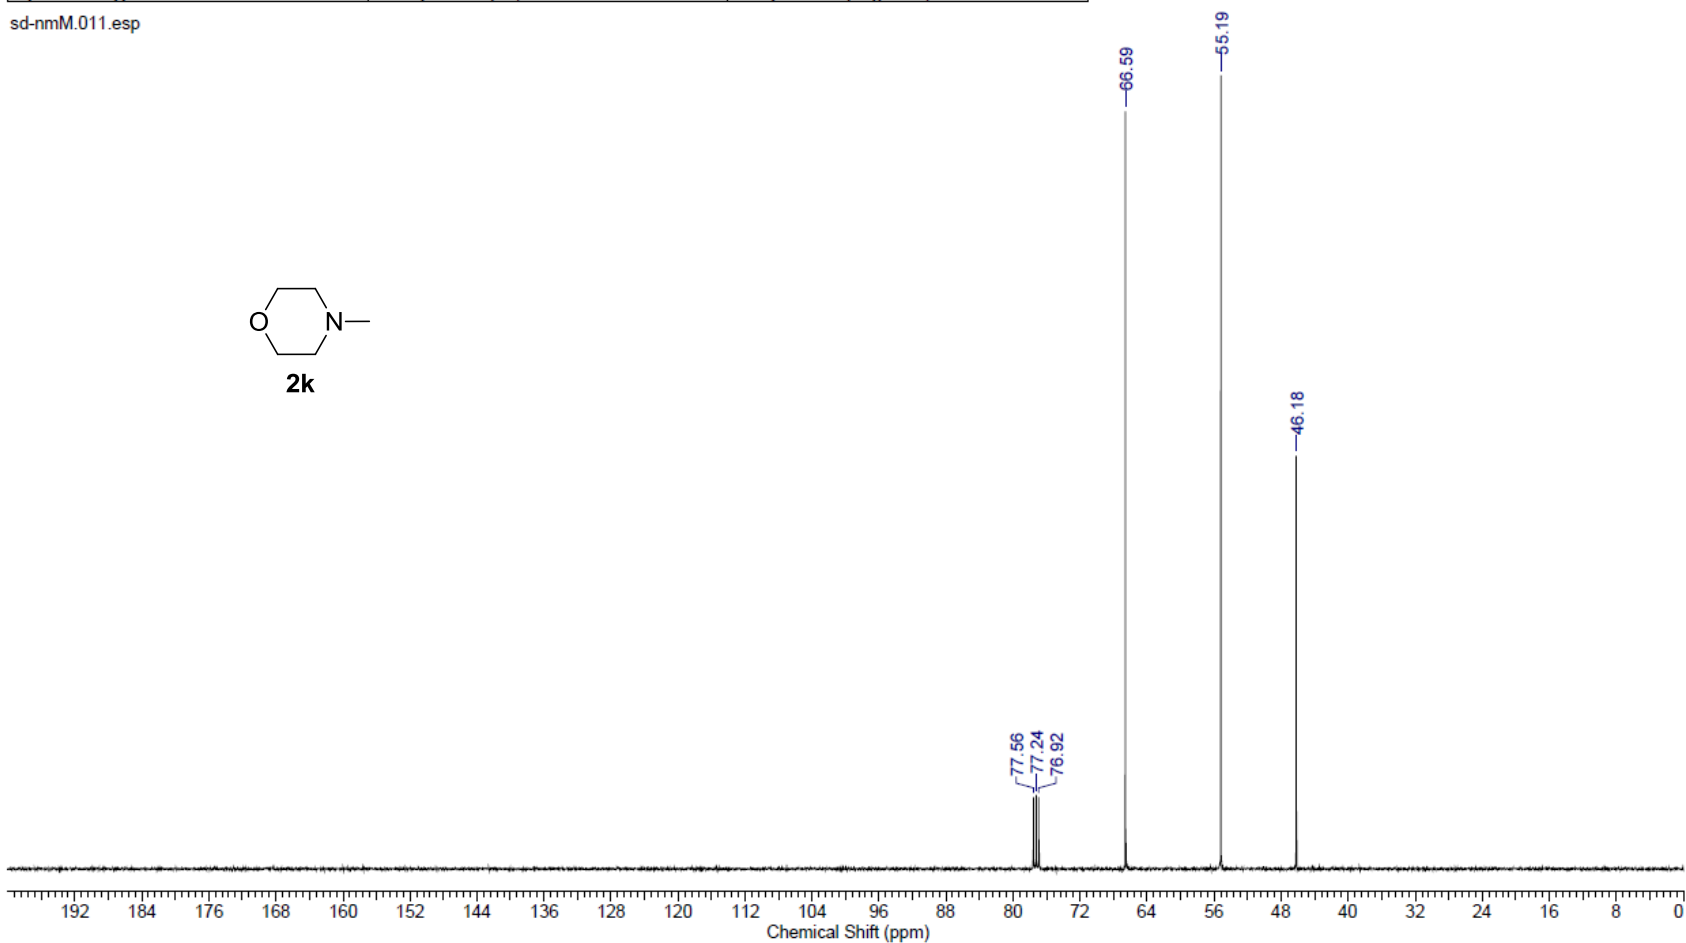

Figure S22. <sup>13</sup>C NMR Spectrum of 2k

This report was created by ACD/NMR Processor Academic Edition. For more information go to [www.acdlabs.com/nmrproc/](http://www.acdlabs.com/nmrproc/)

|                        |                      |                   |          |                      |                                                                                 |                        |        |
|------------------------|----------------------|-------------------|----------|----------------------|---------------------------------------------------------------------------------|------------------------|--------|
| Acquisition Time (sec) | 5.4657               | Comment           | SD-505   | Date                 | 26 Mar 2015 08:36:32                                                            |                        |        |
| Date Stamp             | 26 Mar 2015 08:36:32 | Nucleus           | 1H       | File Name            | \\labes\Bitec-s\partages\scbm\SMCB RMN\TRITIUM\DATA\TRITIUM\NMR\SD-505PUR\2\FID |                        |        |
| Frequency (MHz)        | 400.13               | Owner             | BRUKER   | Number of Transients | 8                                                                               | Origin                 | spect  |
| Original Points Count  | 32768                | SW(cyclical) (Hz) | 5995.20  | Points Count         | 32768                                                                           | Pulse Sequence         | zq45   |
| Receiver Gain          | 40.30                | Spectrum Type     | STANDARD | Solvent              | CHLOROFORM-d                                                                    |                        |        |
| Spectrum Offset (Hz)   | 2400.0000            |                   |          | Sweep Width (Hz)     | 5995.02                                                                         | Temperature (degree C) | 27.000 |

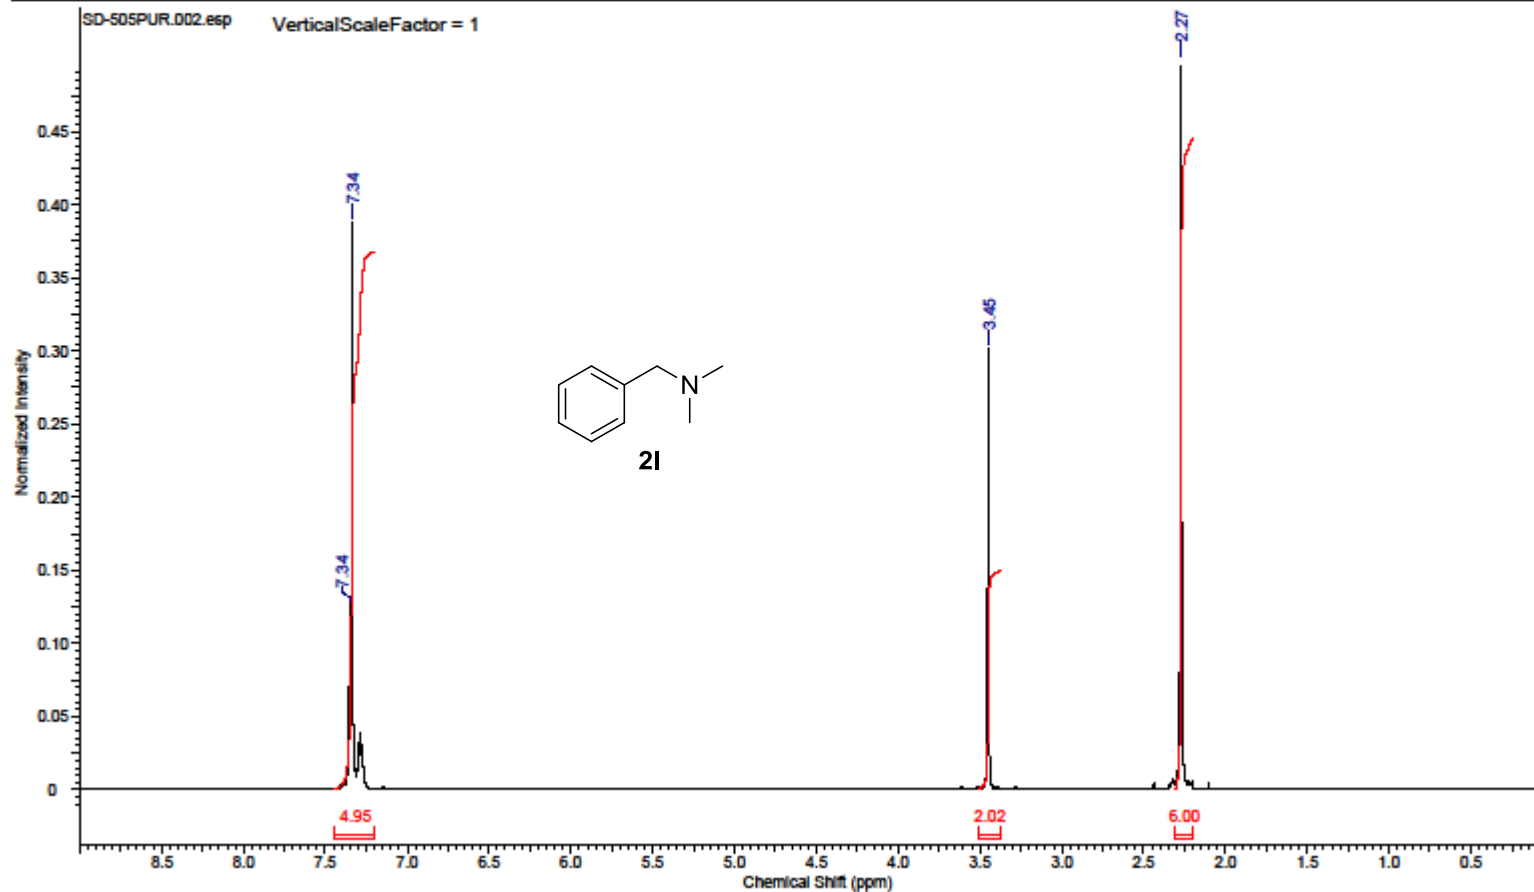

Figure S23.  $^1\text{H}$  NMR Spectrum of 21



This report was created by ACD/NMR Processor Academic Edition. For more information go to [www.acdlabs.com/nmrproc/](http://www.acdlabs.com/nmrproc/)

|                        |                      |                   |          |                        |                                                                                  |
|------------------------|----------------------|-------------------|----------|------------------------|----------------------------------------------------------------------------------|
| Acquisition Time (sec) | 0.6521               | Comment           | SD-505   | Date                   | 26 Mar 2015 08:47:12                                                             |
| Date Stamp             | 26 Mar 2015 08:47:12 | Nucleus           | 13C      | File Name              | \\labes\Bitec-s\partages\scbm\SMCB_RMNI\TRITIUM\DATA\TRITIUM\NMR\SD-505PUR\3\FID |
| Frequency (MHz)        | 100.62               | Owner             | BRUKER   | Number of Transients   | 126                                                                              |
| Original Points Count  | 16384                | SW(cyclical) (Hz) | 25125.63 | Points Count           | 16384                                                                            |
| Receiver Gain          | 2896.30              | Spectrum Type     | STANDARD | Solvent                | CHLOROFORM-d                                                                     |
| Spectrum Offset (Hz)   | 11561.2373           |                   |          | Pulse Sequence         | zpgq30                                                                           |
|                        |                      |                   |          | Sweep Width (Hz)       | 25124.09                                                                         |
|                        |                      |                   |          | Temperature (degree C) | 23.000                                                                           |

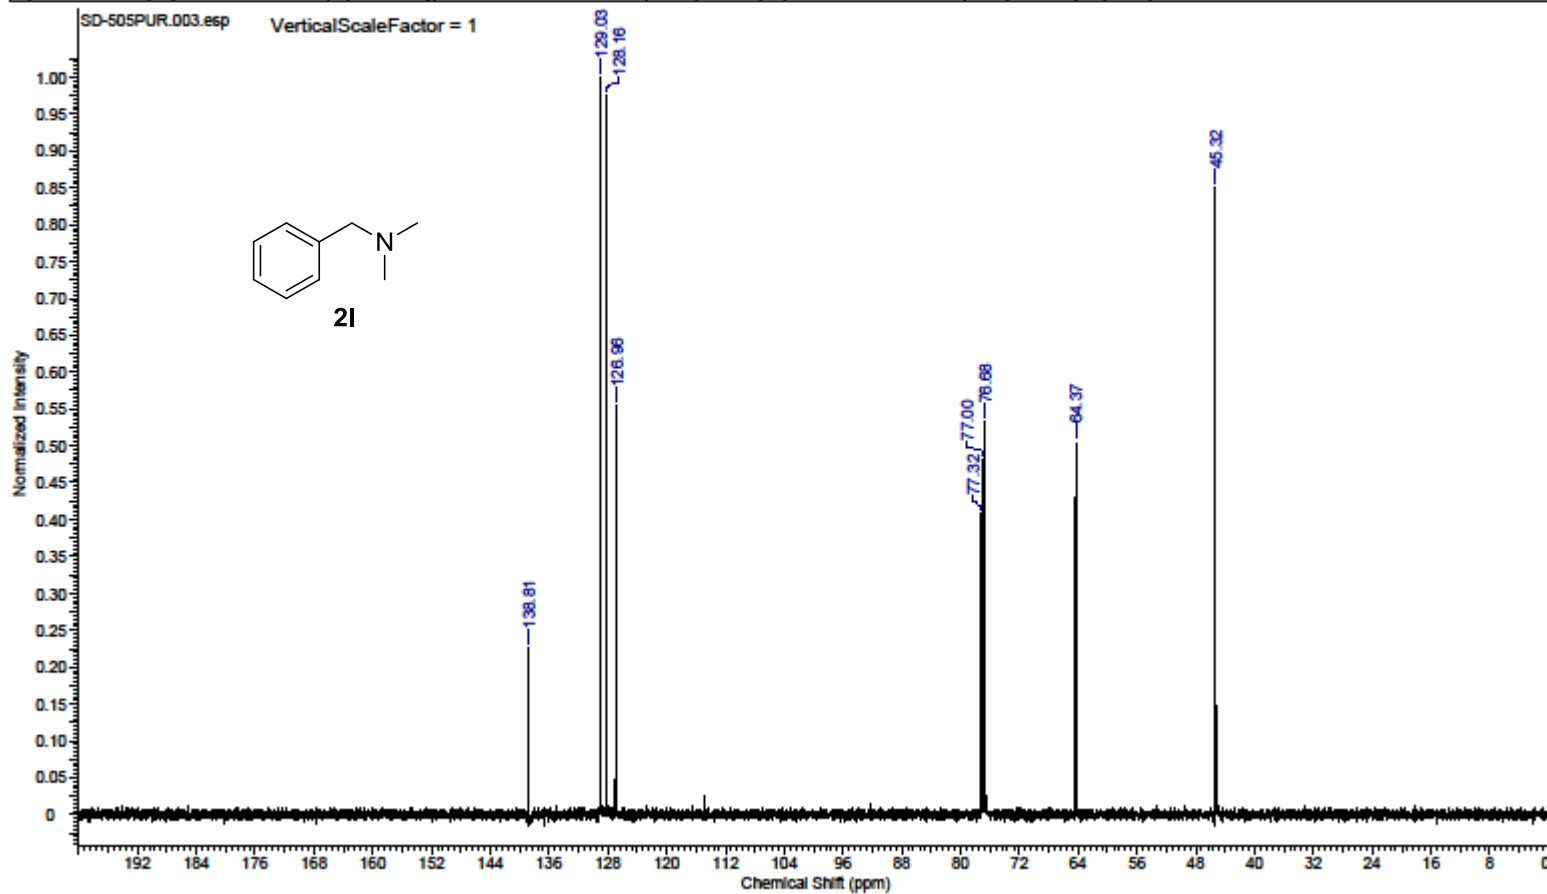

Figure S24.  $^{13}\text{C}$  NMR Spectrum of 21

This report was created by ACD/NMR Processor Academic Edition. For more information go to [www.acdlabs.com/nmrproc/](http://www.acdlabs.com/nmrproc/)

|                        |                                                                                        |                      |                                     |                        |                      |
|------------------------|----------------------------------------------------------------------------------------|----------------------|-------------------------------------|------------------------|----------------------|
| Acquisition Time (sec) | 0.2785                                                                                 | Comment              | 5 mm PABBO BB-1H Z-GRD Z824801/0109 | Date                   | 13 Apr 2015 11:40:16 |
| Date Stamp             | 13 Apr 2015 11:40:16                                                                   |                      |                                     |                        |                      |
| File Name              | \\labies\Bitec-s\partages\scbm\SMACB_RM\NTRITUM\DATA\TRITUM\NMR\SD512-DEUTERIUM\11\FID |                      |                                     | Frequency (MHz)        | 61.42                |
| Nucleus                | 2H                                                                                     | Number of Transients | 3230                                | Origin                 | spect                |
| Owner                  | root                                                                                   | Points Count         | 512                                 | Pulse Sequence         | zgpg                 |
| SW(cyclical) (Hz)      | 1838.24                                                                                | Solvent              | CHCl <sub>3</sub>                   | Receiver Gain          | 12.70                |
| Spectrum Type          | STANDARD                                                                               | Sweep Width (Hz)     | 1834.65                             | Temperature (degree C) | 23.800               |

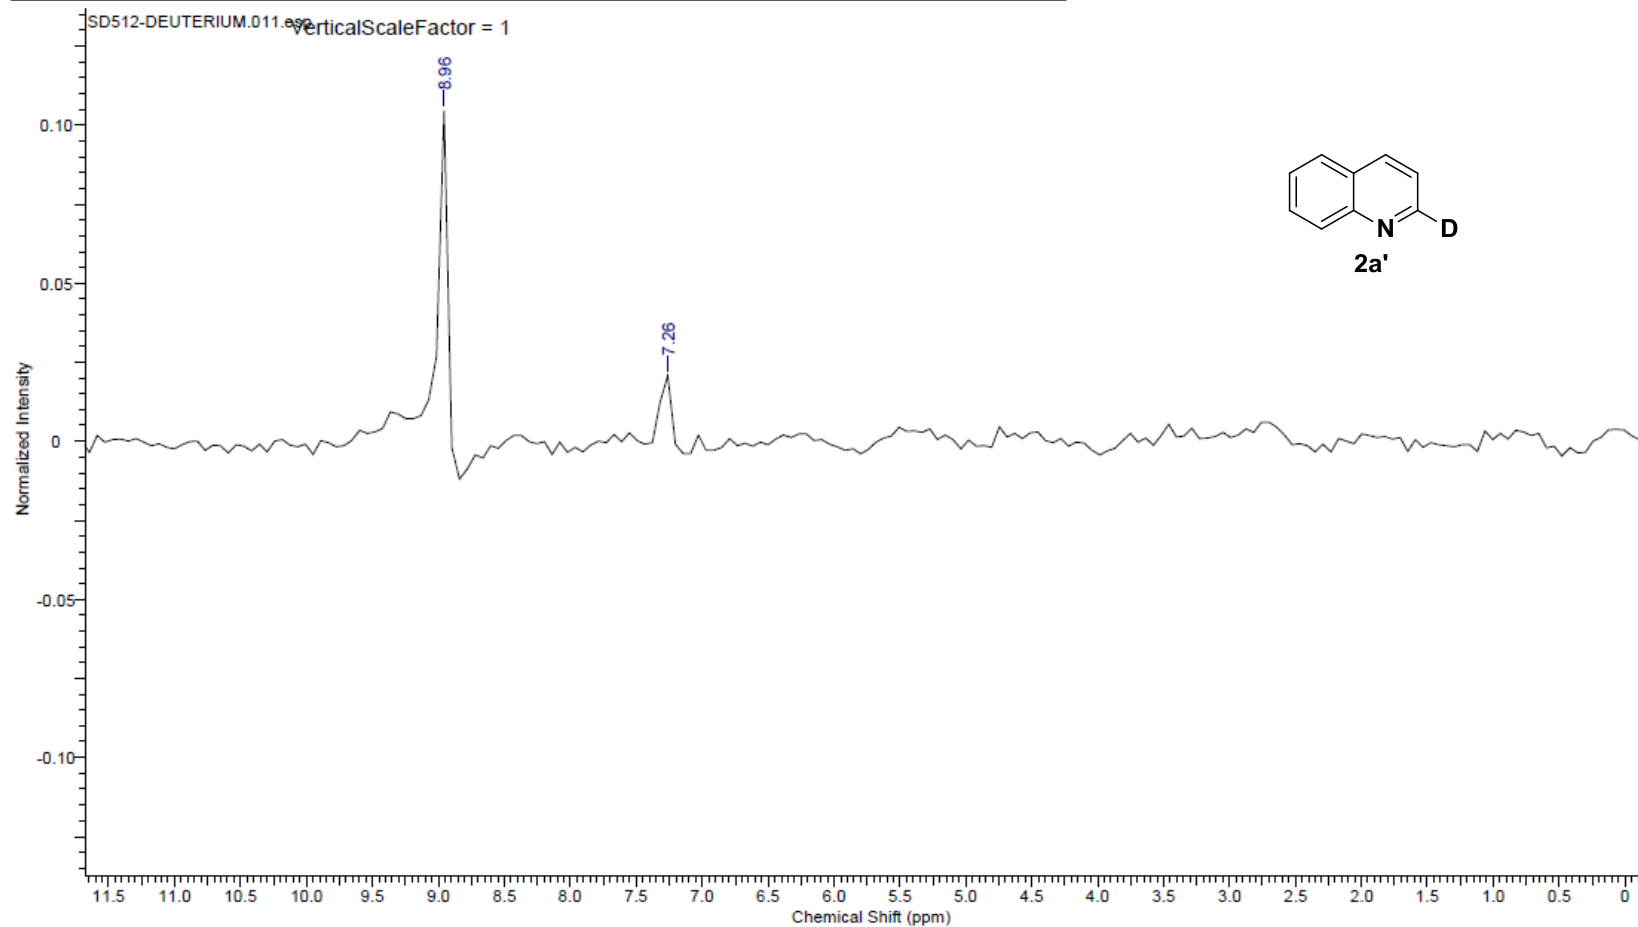

Figure S25. <sup>2</sup>H NMR Spectrum of 2a'

**A typical procedure for the deoxygenation of amine *N*-oxides is given for quinoline *N*-oxide:**

The AuCNT catalyst (0.4 mol%) aqueous suspension was centrifuged and washed three times with dry THF prior to use. Under N<sub>2</sub>, to a solution of quinoline *N*-oxide (0.1 mmol) in dry THF (1 mL) was added the AuCNT catalyst and dimethylphenylsilane (0.11 mmol). The resulting mixture was stirred at room temperature and the progress of the reaction was monitored by TLC. After completion, water (2 mL) was added and the aqueous phase was extracted with dichloromethane (3 × 5 mL). The combined organic layers were dried over anhydrous Na<sub>2</sub>SO<sub>4</sub>, filtered, and concentrated under vacuum. The crude material was then purified by silica gel column chromatography (cyclohexane/EtOAc, 95:5) to afford quinoline as colorless oil (84% yield).

**Quinoline (2a)**

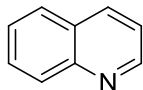

<sup>1</sup>H NMR (500 MHz, CDCl<sub>3</sub>) δ 8.95-8.90 (m, 1H), 8.15 (d, *J* = 8.3 Hz, 1H), 8.11 (d, *J* = 8.1 Hz, 1H), 7.81 (d, *J* = 7.9 Hz, 1H), 7.71 (td, *J* = 8.1, 1.3 Hz, 1H), 7.54 (td, *J* = 7.9, 1.3 Hz, 1H), 7.38 (dd, *J* = 8.3 Hz, *J* = 4.2 Hz, 1H).

<sup>13</sup>C NMR (126 MHz, CDCl<sub>3</sub>) δ 150.5, 148.4, 136.3, 129.6, 129.6, 128.5, 128.0, 126.7, 121.3.

**Isoquinoline (2b)**

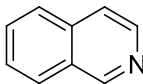

<sup>1</sup>H NMR (500 MHz, CDCl<sub>3</sub>) δ 9.25 (s, 1H), 8.51 (d, *J* = 5.8 Hz, 1H), 7.95 (d, *J* = 7.8 Hz, 1H), 7.81 (d, *J* = 7.9 Hz, 1H), 7.68 (t, *J* = 7.9 Hz, 1H), 7.64 (d, *J* = 5.8 Hz, 1H), 7.59 (t, *J* = 7.8 Hz, 1H).

<sup>13</sup>C NMR (125 MHz, CDCl<sub>3</sub>) δ 152.6, 143.0, 135.9, 130.5, 128.8, 127.8, 127.4, 126.6, 120.7.

**Pyridine (2c)**

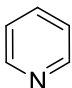

<sup>1</sup>H NMR (400 MHz, CDCl<sub>3</sub>) δ 8.56 (s, 2H), 7.65-7.62 (m, 1H), 7.26-7.23 (m, 2H).

<sup>13</sup>C NMR (100 MHz, CDCl<sub>3</sub>) δ 149.6 (2C), 135.9, 123.7 (2C).

### 5-Ethyl-2-methyl pyridine (2d)

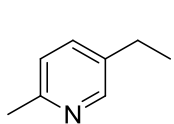

$^1\text{H NMR}$  (400 MHz,  $\text{CDCl}_3$ )  $\delta$  8.32 (d,  $J = 2.1$  Hz, 1H), 7.38 (dd,  $J = 7.9$  Hz,  $J = 2.1$  Hz, 1H), 7.05 (d,  $J = 7.9$  Hz, 1H), 2.58 (q,  $J = 7.6$  Hz, 2H), 2.50 (s, 3H), 1.21 (t,  $J = 7.6$  Hz, 3H).

$^{13}\text{C NMR}$  (100 MHz,  $\text{CDCl}_3$ )  $\delta$  155.6, 148.7, 136.3, 136.0, 123.0, 25.8, 24.0, 15.6.

### 4-Phenylpyridine (2e)

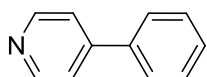

$^1\text{H NMR}$  (400 MHz,  $\text{CDCl}_3$ )  $\delta$  8.67 (s, 2H), 7.64 (d,  $J = 8.0$  Hz, 2H), 7.53-7.45 (m, 5H).

$^{13}\text{C NMR}$  (100 MHz,  $\text{CDCl}_3$ )  $\delta$  150.0 (2C), 148.5, 138.0, 129.1 (3C), 127.0 (2C), 121.6 (2C).

### 2-Bromopyridine (2f)

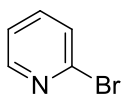

$^1\text{H NMR}$  (400 MHz,  $\text{CDCl}_3$ )  $\delta$  8.30-8.40 (m, 1H), 7.55-7.50 (m, 1H), 7.46-7.44 (m, 1H), 7.26-7.21 (m, 1H).

$^{13}\text{C NMR}$  (100 MHz,  $\text{CDCl}_3$ )  $\delta$  150.3, 142.4, 138.6, 128.4, 122.8.

### Mercaptopyridine (2g)

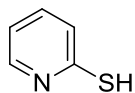

$^1\text{H NMR}$  (400 MHz,  $\text{DMSO-}d_6$ )  $\delta$  13.46 (br s, 1H), 7.60-7.65 (m, 1H), 7.38-7.42 (m, 1H), 7.25-7.30 (m, 1H), 6.72-6.76 (m, 1H).

$^{13}\text{C NMR}$  (100 MHz,  $\text{DMSO-}d_6$ )  $\delta$  177.7, 137.9, 137.5, 133.0, 112.8.

### Isonicotinic acid (2h)

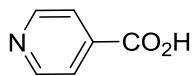

$^1\text{H NMR}$  (400 MHz,  $\text{DMSO-}d_6$ )  $\delta$  8.75 (d,  $J = 6.0$  Hz, 2H), 7.79 (d,  $J = 6.0$  Hz, 2H).

$^{13}\text{C NMR}$  (100 MHz,  $\text{DMSO-}d_6$ )  $\delta$  166.6, 151.0, 138.5, 123.1.

### Adenosine (2i)

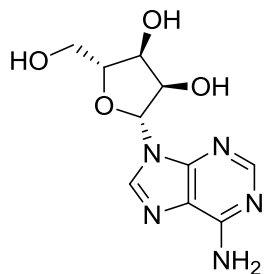

$^1\text{H}$  NMR (400 MHz, DMSO- $d_6$ )  $\delta$  8.33 (s, 1H), 8.12 (s, 1H), 7.33 (s, 2H), 5.86 (d,  $J = 6$  Hz, 1H), 5.44-5.39 (m, 2H), 5.17 (d,  $J = 4.4$  Hz, 1H), 4.59 (q,  $J = 5.9$  Hz, 1H), 4.12 (q, 4.1 Hz, 1H), 3.94 (q,  $J = 3.2$  Hz, 1H), 3.67 (m, 1H), 3.53 (m, 1H).

$^{13}\text{C}$  NMR (100 MHz, DMSO- $d_6$ )  $\delta$  156.6, 152.8, 149.5, 140.3, 119.8, 88.3, 86.3, 73.8, 71.1, 62.1.

### *N*-Methyl morpholine (2j)

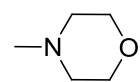

$^1\text{H}$  NMR (400 MHz,  $\text{CDCl}_3$ )  $\delta$  3.58 (s, 4H), 2.28 (s, 4H), 2.16 (s, 3H).

$^{13}\text{C}$  NMR (100 MHz,  $\text{CDCl}_3$ )  $\delta$  66.9 (2C), 55.4 (2C), 46.4.

### Tri-*n*-butylamine (2k)

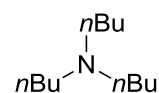

$^1\text{H}$  NMR (400 MHz,  $\text{CDCl}_3$ )  $\delta$  2.40 (t,  $J = 7.6$  Hz, 6H), 1.45-1.38 (m, 6H), 1.28 (m, 6H), 0.91 (t,  $J = 7.4$  Hz, 9H).

$^{13}\text{C}$  NMR (100 MHz,  $\text{CDCl}_3$ )  $\delta$  53.8 (3C), 29.1 (3C), 20.7 (3C), 14.0 (3C).

### *N,N*-dimethyl-1-phenylmethanamine (2l)

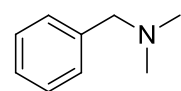

$^1\text{H}$  NMR (400 MHz,  $\text{CDCl}_3$ )  $\delta$  7.35-7.24 (m, 5H), 3.43 (s, 2H), 2.52 (s, 6H).

$^{13}\text{C}$  NMR (100 MHz,  $\text{CDCl}_3$ )  $\delta$  138.8, 129.1 (2C), 128.2 (2C), 127.0, 64.4, 45.3 (2C).
